1 **Continuous variable response, kinetic gating and connectivity that govern IS topology are**  
2 **perturbed in hyperinsulinemia**

3 Namrata Shukla<sup>1\*</sup>, Shantanu Kadam<sup>2\*</sup>, Ranjith Padinhateeri<sup>2#</sup> and Ullas Kolthur-Seetharam<sup>1#</sup>

4 <sup>1</sup>Department of Biological Sciences, Tata Institute of Fundamental Research, Mumbai,  
5 Maharashtra, 400005, India

6 <sup>2</sup>Department of Biosciences and Bioengineering, Indian Institute of Technology Bombay,  
7 Mumbai, Maharashtra 400076, India

8 \*Joint first authors: Namrata Shukla and Shantanu Kadam

9 # Joint corresponding authors: Ranjith Padinhateeri (ranjithp@iitb.ac.in) and Ullas Kolthur-  
10 Seetharam (ullas@tifr.res.in)

## 11 **Abstract**

12 Understanding kinetic control of biological processes is as important as identifying  
13 components that constitute pathways. Insulin-signaling (IS) is central for almost all  
14 metazoans and its perturbations are associated with various diseases and aging. While  
15 temporal phosphorylation changes and kinetic constants have provided some insights,  
16 constant or variable parameters that establish and maintain signal topology are poorly  
17 understood. Our iterative experimental and mathematical simulation-based approaches  
18 reveal novel kinetic parameters that encode concentration and nutrient dependent  
19 information. Further, we find that pulsatile fasting insulin rewires IS akin to memory and in  
20 anticipation of a fed response. Importantly, selective kinetic gating of signals and maximum  
21 connectivity, between metabolic and growth-factor arms under normo-insulinemic states,  
22 maintains network topology. In addition to unraveling kinetic constraints that determine  
23 cascade architecture, our findings will help in identifying novel therapeutic strategies that  
24 conserve coupling between metabolic and growth-factor arms, which is lost in diseases and  
25 conditions of hyperinsulinemia.

## 26 Introduction

27           Signaling cascades are essential for regulating cellular processes and decades of  
28 work has unraveled molecular and biochemical mechanisms that constitute them. However,  
29 kinetic parameters that define emergent properties of signaling networks and therefore  
30 predict regulatory nodes are poorly understood. While independent experimental and  
31 mathematical approaches have provided valuable insights (Behar et al., 2008; Faro et al.,  
32 2017; Kubota et al., 2012; Shinar et al., 2007; Somvanshi et al., 2019; Vinod and Venkatesh,  
33 2009; Wilson et al., 2017), studies that capture dynamics and complexities of signaling  
34 architecture vis-à-vis physiological variations in input strengths are far fewer. Not only  
35 would these reveal fundamental kinetic considerations that determine signal topology but  
36 also inform about reactions/entities that could emerge as therapeutic targets.

37           Insulin signaling (IS), an evolutionarily conserved mechanism is essential for  
38 cellular/organismal metabolism and growth (Boucher et al., 2014; Haeusler et al., 2018;  
39 Saltiel and Kahn, 2001). Aberrant IS is associated both causally and consequentially with  
40 growth abnormalities, inflammation, accelerated aging and diseases including metabolic  
41 disorders and cancer (Arcidiacono et al., 2012; Guo, 2014; Hill and Milner, 1985;  
42 Shimobayashi et al., 2018; Shoelson et al., 2006; Vigneri et al., 2020). Genetic perturbations  
43 and omics-based studies have elucidated importance of key phosphorylation events in  
44 response to insulin stimulation (Humphrey et al., 2015; Krüger et al., 2008; Schmelzle et al.,  
45 2006; Yugi et al., 2014). Recent reports have provided crucial insights into physical protein  
46 interactomes, temporal changes in phospho-proteome and kinetic constants, viz  $T_{1/2}$  and  
47  $EC_{50}$  (Kubota et al., 2018; Vinayagam et al., 2016). However, kinetic parameters that govern  
48 network properties of IS as a function of normo-insulinemic and hyper-insulinemic states

49 that could collectively determine physiological and pathophysiological outcomes is still  
50 lacking.

51 Our current understanding largely stems from studies, which have used either supra-  
52 physiological or static concentrations of insulin. It is important to note that circulating  
53 insulin concentrations vary drastically from being low/pulsatile to high/biphasic in fasted  
54 and fed states respectively (Krishnan et al., 2018; Lu et al., 2012; Pørksen, 2002; Vander  
55 Haar et al., 2007). Moreover, hyper-insulinemia is associated with metabolic disorders such  
56 as diabetes and obesity (Menge et al., 2011; Satin et al., 2015; Schmelzle et al., 2006). These  
57 are key considerations since kinetic criteria that either encode fasted-to-fed transitions or  
58 drive pathological manifestations of IS are unknown. Furthermore, IS can be broadly divided  
59 into metabolic and growth factor arms (Mendoza et al., 2011; Petersen and Shulman, 2018).  
60 In this regard, while biased signaling is implicated in diseases, if/how the flow of information  
61 is stratified and maintained remains to be unraveled.

62 Mathematical approaches to model cellular signaling have gained traction in the  
63 recent past to understand the dynamics and also to provide predictive parameters that  
64 define topology of signaling network (Cedersund et al., 2008; Dalle Pezze et al., 2016; Di  
65 Camillo et al., 2016; Sedaghat et al., 2002; Sonntag et al., 2012). Earlier such attempts to  
66 determine kinetics of insulin signaling have largely employed “averaged” measures to define  
67 the behavior of the system (Kubota et al., 2018). Importantly, given the fluctuations in  
68 insulin levels and inherent noise in signaling, there are no reports that have computed  
69 kinetic parameters, which capture emergent properties of IS. Specifically, while there have  
70 been simulation based approaches to define dose-to-duration effects and kinetic insulation

71 on synthetic signaling networks (Behar et al., 2007), such principles have not been applied  
72 to complex cascades such as insulin signaling.

73 In this regard, our current study addresses how connectedness among signaling  
74 components as well as overall network topology is maintained under physiological  
75 concentrations of insulin. We further highlight the concentration dependency of barriers in  
76 the signaling cascade which maintain hierarchy. Additionally, our study puts emphasis on  
77 the importance of dynamic range and pulsatility in signaling which generates memory as  
78 well as couples the metabolic and growth factor arms.

79

## 80 **Results**

### 81 **Distinct kinetics of signaling in response to physiological and non-physiological** 82 **concentrations of insulin**

83 Although previous reports have attempted to elucidate dynamics of insulin signaling,  
84 kinetic parameters that define signaling architecture in response to physiologically relevant  
85 insulin concentrations remain to be unraveled. This is particularly important since circulating  
86 concentrations of insulin vary between 0.1 nM and 1.0 nM during normal fed-fast cycles.  
87 Moreover, insulin signaling achieves both nutrient uptake and its utilization via anabolic  
88 processes, whose perturbations are associated with diseases and accelerated aging. Thus,  
89 we wanted to assess the kinetics of signaling through nodal kinases in the cascade, which  
90 govern both the metabolic and growth factor arms (Figure 1A). Given the importance of  
91 liver in modulation of insulin action and integration of whole-body physiology, we employed  
92 primary hepatocytes. Towards this, primary hepatocytes isolated from mice livers were

93 treated with different concentrations of insulin as described in Figure 1B. Our paradigm  
94 ensured that the kinetic evaluation did not have any bearing from either residual signals or  
95 nutrient inputs alone, as illustrated in Figure 1B and Figure 1- figure supplement 1, A-D.

96 As reported by others (Borisov et al., 2009; Kubota et al., 2012; Kubota et al., 2018;  
97 Noguchi et al., 2013) insulin treatment led to a rapid activation of downstream signaling and  
98 was consistent with a fed response (Figure 1C-E, Figure 1- figure supplement 1E-F and Figure  
99 1- figure supplement 2A-B). Expectedly, overall signal intensities (i.e. area under the curve:  
100 AUC), for all the phosphorylation events scored in our assay, were positively correlated with  
101 insulin concentration (Figure 1- figure supplement 2C). We define true discovery rate as a  
102 statistical measure to compare changes in phosphorylations across time and insulin  
103 concentrations. This parameter further validates the statistical robustness of our  
104 measurements (Figure 1- figure supplement 2D). It was striking to see that the kinetic  
105 behavior of nodal kinases in the cascade, AKT and ERK, was markedly different (Figure 1D-E,  
106 Figure 1- figure supplement 1E-F, 2A-B and 3C), which has not been highlighted in any of the  
107 previous studies. Importantly, we observe non-linear and non-monotonic association of  
108 signal intensities w.r.t insulin concentrations, across the cascade, both in terms of extent of  
109 phosphorylation and temporal behavior.

110 For example, activation-inactivation kinetics was starkly different for AKT (T<sup>308</sup> and  
111 S<sup>473</sup>) and ERK. In addition to this, while the final intensity of AKT phosphorylation  
112 approached baseline by 120 minutes, ERK phosphorylation showed a distinct second wave  
113 of activation (Figure 1D-E, Figure 1- figure supplement 1E-F, 2A-B and 3C). Similarly, we  
114 found that initial induction of phosphorylation of GSK3 $\beta$  and S6K was phase delayed in  
115 response to 0.1 nM and 1.0 nM insulin treatments and continued to remain elevated long

116 after phosphorylation on AKT started to extinguish (Figure 1- figure supplement 1E-F, 2A-B  
117 and 3A-B).

118 Further, on comparing both fed and fasted insulin concentrations, it was apparent  
119 that maximal phosphorylation and its sustenance varied drastically for nodal kinase AKT, as  
120 can be seen in Figure 1D-E. These clearly indicated that insulin-dependent programming of  
121 signaling kinetics was distinct and prompted us to investigate the kinetic parameters that  
122 defined this behavior. We adopted an iterative experimental-cum-mathematical approach  
123 to gain further insights.

#### 124 **Mathematical modelling of signaling kinetics and predictive assessment of key** 125 **phosphorylation-dephosphorylation dynamics**

126 Based on our experimental results, we modeled the signaling cascade using  
127 mathematical methods with an aim to extract kinetic parameters that define the network.  
128 We considered the insulin signaling network as a set of coupled biochemical reactions and  
129 used ordinary differential equations (ODE) to describe the system (Aoki et al., 2013; Arkun,  
130 2016; Borisov et al., 2009; Dalle Pezze et al., 2016; Dalle Pezze et al., 2012; Di Camillo et al.,  
131 2016; Ho et al., 2015; Huang et al., 2014; Kubota et al., 2012; Kubota et al., 2018; Noguchi et  
132 al., 2013; Sedaghat et al., 2002; Zhao et al., 2017). Importantly, we set out to not only test  
133 the robustness of our mathematical simulation using experimental results, but also predict  
134 the behavior of components that were not measured experimentally.

135 As shown in Figure 1F-1G and Figure 1 – figure supplement 3D-F, the simulation results for  
136  $\text{pAKT}^{\text{T308}}$ ,  $\text{pAKT}^{\text{S73}}$ ,  $\text{pGSK3}\beta^{\text{S9}}$ ,  $\text{pS6K}^{\text{T389}}$  and  $\text{pERK}^{\text{T202/Y204}}$  were consistent and nearly  
137 overlapping with the experimental data, across insulin concentrations. Next, using

138 experimentally optimized parameters as input, we simulated the phosphorylation dynamics  
139 of insulin receptor (IR), mTORC1 and mTORC2 (Figure 1 – figure supplement 3G).

140 While downstream components scaled with insulin concentration, the most upstream event  
141 of insulin receptor phosphorylation was rapid and transient. Intriguingly, kinetics of mTORC1  
142 and mTORC2 were starkly different (Figure 1 – figure supplement 3G). Moreover, even  
143 though mTORC2 is not directly downstream to IR, we found their responsivity to be similar  
144 qualitatively. To our best knowledge this is one of the first attempts that delineates  
145 temporal variations in activation of mTOR complexes. Given that mTORC2 is the primary  
146 kinase for S<sup>473</sup> phosphorylation, the discordant dynamics of mTORC2 phosphorylation and  
147 pAKT<sup>S473</sup> predicts additional regulatory steps in controlling activation of AKT (Figure 1D and  
148 Figure 1 – figure supplement 3G).

149 We also used stochastic simulations to provide an alternative approach to validate  
150 our mathematical predictions, which qualitatively resembled the deterministic approach for  
151 quantities as described in Figure 1H. In addition to predicting the response at a population  
152 level, this allowed us to determine the fluctuations in the system and compare it with  
153 signaling topology (see below).

154 In order to score the robustness of our simulation data, we computed the z-score for  
155 all components assessed in the signaling cascade across concentrations (Figure 1I). It is  
156 important to note that our iterative toggling between computational and experimental  
157 determination of phosphorylation gave highly consistent results. Further, low values of false  
158 discovery rate calculations suggested statistical similarity between simulation and  
159 experimental data (Figure 1 – figure supplement 3H).

160 **AKT-dependent responsivity to insulin is determined by phosphorylation at S<sup>473</sup>**



161 Several reports have highlighted the necessity of dual phosphorylation of AKT at T<sup>308</sup>  
162 and S<sup>473</sup> for its activity (Bertuzzi et al., 2016; Manning and Toker, 2017; Sarbassov et al.,  
163 2005). Despite this it is still unclear as to which of these provides the gain in terms of signal  
164 strength and responds to dynamic changes in insulin concentrations. Thus, we computed  
165 percentage gain in signal against physiological insulin concentrations of 0.1 and 1 nM for  
166 pAKT<sup>T308</sup> and pAKT<sup>S473</sup> (Figure 2A). pAKT<sup>T308</sup>, that is directly downstream to insulin receptor,  
167 showed comparable activation with no change in peak intensity across fasted and fed insulin  
168 concentrations. On the contrary, pAKT<sup>S473</sup>, which is indirectly dependent on insulin via  
169 mTORC2, displayed dose responsiveness to insulin concentrations and variable kinetics  
170 (Figure 2A-B). This finding posits that while pAKT<sup>T308</sup> may serve to prime the signaling,  
171 pAKT<sup>S473</sup> determines the extent of overall activation in response to fed insulin doses.

## 172 **Non-concordant peak and final amplitudes define dynamic range of nodal signaling events**

173 Threshold of activation and dynamic range are key determinants of responsivity in  
174 signaling, especially when the inputs are dynamic, as in the case of IS. We wanted to  
175 determine (a) the relationship between peak intensity and decay kinetics, and (b) dynamic  
176 range and threshold activation, which collectively dictate the physiological output. Phase  
177 diagram depicting peak amplitudes and decay time of phosphorylation events highlighted  
178 non-concordance between these for AKT but not for pGSK3 $\beta$  and pS6K (Figure 2B).

179 Most experimental approaches in the past have assayed for signaling in response to  
180 very high inputs, which is rarely physiological. Such deterministic evaluation of signaling also  
181 masks threshold kinetics, which is critical to encode biological response. Therefore, on  
182 simulating the phosphorylation events across concentrations from 0.1 nM to 1.0 nM, we  
183 found disparate dynamic ranges for activation (Figure 2C). While AKT phosphorylations

184 (both at S<sup>473</sup> and T<sup>308</sup>) displayed large and nearly overlapping dynamic range, pS6K<sup>T389</sup> and  
185 pGSK3 $\beta$ <sup>S9</sup> reach saturation at lower concentrations of insulin (Figure 2C-D). Taken together  
186 with dose-dependency of pAKT<sup>S473</sup> (Figure 2A), these results clearly suggest that while dual  
187 phosphorylation of AKT is important for its activity, pAKT<sup>S473</sup> is a crucial regulatory node  
188 during fast to fed transitions.

189 Since our simulations predicted non-saturation dynamics for pAKT<sup>S473</sup>, we wanted to  
190 experimentally verify if this was indeed the case. We specifically chose 0.3 nM and 0.6 nM,  
191 as the response is linear at 0.3 nM and begins to plateau at 0.6 nM insulin. As shown in  
192 Figure 2 – figure supplement 1A-B, our experimental results were consistent with the  
193 mathematical predictions and clearly indicated that pAKT<sup>S473</sup> indeed displayed a large  
194 dynamic range to insulin inputs.

195 Interestingly, the variability in dynamic range was independent of the final  
196 amplitudes (Figure 2 – figure supplement 1C) as it returned to the same level at 120min, for  
197 all the phosphorylations assessed. Such non-concordance between peak and final  
198 amplitudes across signaling components raised the exciting possibility of existence of (a)  
199 kinetic insulation of signals and (b) memory of fasted insulin inputs, which together would  
200 define the fed insulin response.

### 201 **Diverse insulin inputs generate differential kinetic gates and signal noise**

202 In a multi-component and multi-step signaling cascade, such as insulin signaling, it is  
203 important to determine parameters that (a) define the topology or the information flow  
204 through the network and (b) those that maintain robustness of the network/topology.  
205 Kinetic insulation has been proposed as one of the key determinants of non-uniform flow of  
206 information. Although inferred by mathematical approaches (Behar et al., 2007; Behar et al.,

207 2008) on a synthetic cellular signaling cascade, it has not been applied to a dynamic  
208 physiological system such as insulin signaling.

209 In this context, we used our experimental data and mathematical simulations  
210 (methods) to deduce kinetic gates that define topology of insulin signaling. To reveal kinetic  
211 gating/insulation we computed rate constants for phosphorylation events, which included  
212 known feed-forward and feed-back regulatory inputs (Figure 3- figure supplementary 1A-B).  
213 A simple-minded assumption was that very high or low ratios of  $K_{ON}/K_{OFF}$  would constitute  
214 kinetic “gates” that determined differential flow of signals. A phase diagram of  $K_{ON}/K_{OFF}$   
215 ratios for key phosphorylation events is depicted in Figure 3A, wherein we applied  $10^{+/-1}$  as  
216 the threshold or barrier.

217 Interestingly, at insulin concentration of 1 nM, which mimics a physiologically fed state,  
218 most reactions were not gated and were unlike the response to very low and very high  
219 insulin concentrations. For example, AKT activation (reaction 5) was more sensitive at lower  
220 insulin concentration i.e. there was a negative barrier while at 1 and 10 nM there was no  
221 gating. On the contrary, activation of GSK3 $\beta$  (reaction 10) was highly gated at both very low  
222 and very high insulin concentrations. We also observed a peculiar pattern between nodal  
223 priming events {viz. reactions 1 (Ins+IR  $\rightleftharpoons$  p1IRC), 6 (ppAKT+mTORC1  $\rightleftharpoons$  ppAKT+pmTORC1),  
224 10 (ppAKT+GSK3 $\beta$   $\rightleftharpoons$  ppAKT+pGSK3 $\beta$ ) and 11 (p1IRC+Raf  $\rightleftharpoons$  p1IRC+Raf\*)} and their effector  
225 or downstream phosphorylations {reactions 4 (p1IRC+pAKT<sup>S473</sup>  $\rightleftharpoons$  p1IRC+ppAKT), 5  
226 (pmTORC2+pAKT<sup>T308</sup>  $\rightleftharpoons$  pmTORC2+ppAKT) and 12 (Raf\*+ERK  $\rightleftharpoons$  Raf\*+ppERK)} vis-à-vis  
227 kinetic gates specifically at 0.1 nM. Together, it was striking to see that strong negative and  
228 positive barriers were differentially associated with metabolic and growth factor arms of the  
229 cascade in response to fasted, fed and supra-physiological insulin inputs.

230 Since phosphorylation of AKT is one of the central events that is used as surrogate  
231 for IS, and given the differential dynamics of  $\text{pAKT}^{\text{T308}}$  and  $\text{pAKT}^{\text{S473}}$ , we wanted to assess  
232 their individual contributions to functional flexibility. We went ahead to compute noise in  
233 their signaling (fluctuations on mathematically determined concentrations; see methods).  
234 This is relevant as often noise in biology becomes important for mounting a robust response  
235 in addition to generating functional heterogeneity and flexibility especially in a dynamic  
236 system like IS (Bowsher et al., 2013; Silva-Rocha and de Lorenzo, 2010; Thattai and Van  
237 Oudenaarden, 2001). As shown in Figure 3B, we observed that lower concentrations of  
238 insulin generate more noise than higher concentration across time points assessed. While  
239 being in general agreement with similar measurements of other biological parameters, this  
240 also indicated that the differential phosphorylation dynamics of  $\text{AKT}^{\text{T308}}$  and  $\text{AKT}^{\text{S473}}$  were  
241 independent of noise. In summary, the results described in this section clearly indicated that  
242 differential insulin inputs mounted diverse kinetic responses, which together could possibly  
243 exert a control over topology of the cascade.

#### 244 **Robust IS topology is achieved at physiological insulin inputs**

245 Topology and robustness of a network is governed by the degree of connectedness  
246 among the network components and is defined by how correlated their responses are.  
247 Therefore, we set out to ask if supra-/physiological inputs of insulin had any bearing on  
248 signaling topology.

249 Computing Pearson coefficient across time for different insulin concentrations gave  
250 us a correlation matrix comparing each phosphorylation event with the other (Figure 3C).  
251 We observed that maximal correlations are lost under supraphysiological concentration of  
252 10 nM compared to physiological concentrations of insulin.

253           Next, we checked if high degree of correlation in response to fed and fasted insulin  
254 inputs had any impact on the topology of the network. For a maximally connected network  
255 of “n” nodes the maximum number of edges would be  $n(n-1)/2$ ; while the minimum number  
256 of edges would be  $(n-1)$ . Applying this to a five-component system (as in our case) should  
257 give a maximum of 10 connections, although 34 undirected non-isomorphic graphs can be  
258 realized. We found that when 5 nodes (vertices) corresponding to pAKT<sup>S473</sup>, pAKT<sup>T308</sup>,  
259 pS6K<sup>T389</sup>, pGSK3 $\beta$ <sup>S9</sup>, pERK<sup>T202/Y204</sup> were used, maximum connectivity was obtained at  
260 physiological concentrations of insulin (at 0.1 nM and 1.0 nM) (Figure 3D and Figure 3 -  
261 figure supplement 1C). Distinctively the network broke at 10 nM insulin and the node  
262 corresponding to pERK was disconnected, which indicated decoupling of the metabolic and  
263 growth factor arms with possible pathophysiological implications.

264           To understand which of the nodes control topology of the network, we substituted  
265 individual nodes of 0.1 and 1 nM insulin network with that of 10 nM while keeping the rest  
266 unperturbed. Perturbation of every component changed network properties with a  
267 reduction in both the number of nodes as well as edges (Figure 3E and Figure 3- figure  
268 supplement 2 and 3A-D). Interestingly, while perturbation of pAKT<sup>S473</sup> caused disappearance  
269 of some edges, perturbation of pAKT<sup>T308</sup> completely broke the network, bringing the  
270 connections down from 6 to 2 (Figure 3E and F).

### 271 **Pulsatile fasting insulin rewires response to fed insulin inputs akin to memory**

272           Uniquely, insulin is released in a pulsatile manner during a fasted state (O'Meara et  
273 al., 1993; O'Rahilly et al., 1988), which is followed by a biphasic secretion in response to fed  
274 nutrient inputs. As mentioned earlier, while most studies on signaling dynamics have used  
275 high concentrations of insulin, there are no reports that have investigated kinetics and

276 topology vis-à-vis pulsatile fasted insulin inputs. Moreover, if/how a fasted input shapes  
277 signaling architecture in a fed state has not been addressed, thus far.

278 To this end, we pulsed hepatocytes with 0.1 nM insulin and then subsequently treated with  
279 1 nM insulin as a proxy to physiological dynamics of fasted and fed insulin inputs, as  
280 indicated (Figure 4A). Surprisingly, we found that there was neither sustenance nor an  
281 enhanced response to consequent insulin pulses, for pAKT<sup>T308 and S473</sup> (Figure 4B-C and Figure  
282 4 – figure supplement A), which was unanticipated. This striking loss of pAKT signal by the  
283 end of 4<sup>th</sup> pulse (at 0') was distinct from a continuous step treatment as described earlier  
284 (Figure 1D-E) and indicated a memory of signaling. This behavior was not seen for pERK  
285 (Figure 4D and Figure 4 – figure supplement B). Interestingly, pAKT levels reached a new  
286 baseline following pulsatile insulin stimulation (Figure 4B-C). This new reset point of pAKT  
287 also changed the kinetics following 1 nM insulin treatment, which was distinct from pERK,  
288 pGSK3 $\beta$  and pS6K phosphorylation (Figure 4D and Figure 4- figure supplement 1B-F). These  
289 results clearly indicated that fasted insulin pulses created a memory to possibly enhance the  
290 response to fed insulin inputs. In support of this hypothesis, network analyses of this  
291 pulsatile adapted fed IS showed more connectedness (as compared to 1 nM alone) (Figure  
292 4E and Figure 4 – figure supplement 1G). Additionally, we also looked at the transcription of  
293 genes downstream of a pulsatile adapted system. In line with the signaling data, the  
294 transcription of target genes was also more robust post adaptation (Figure 4F).

### 295 **Repeated stimulation by fed insulin abrogates the synergy between the metabolic and** 296 **mitogenic arms of signaling**

297 Although continuous exposure to higher levels of circulating insulin is known to  
298 cause resistance and thus metabolic diseases, the kinetic basis for such a signalling has not

299 been investigated. In this context, we repeat stimulated hepatocytes with 1 nM insulin, as  
300 indicated in Figure 5A. This led to an anomalous response vis-à-vis both metabolic (pAKT)  
301 and mitogenic (pERK) arms of signalling. While pAKT levels decreased drastically, amplitude  
302 of pERK peaks increased following repeated stimulation (RS1 and 2) of fed insulin inputs  
303 (Figure 5B-D and Figure 5- figure supplement 1A). Network analysis following this paradigm  
304 showed complete loss of connections among signalling components (Figure 5E and Figure 5-  
305 figure supplement 1D). This was also apparent with the dynamics of pGSK3b and pS6K,  
306 which remain upregulated despite a downregulation in AKT signalling (Figure 5- figure  
307 supplement 1A-C). Interestingly, repeated stimulation of fed insulin also led to a loss in  
308 transcriptional robustness (Figure 5F).

309

## 310 **Discussion**

311 Coupling nutrient inputs to cellular metabolism, survival and growth is intrinsically  
312 dependent upon Insulin signalling (IS). Hypo- and hyper- activation of IS leads to various  
313 patho-physiologies including diabetes, accelerated aging and cancer, which are attributed to  
314 under- or over-phosphorylation of certain IS components (Arcidiacono et al., 2012; Guo,  
315 2014; Hill and Milner, 1985; Shimobayashi et al., 2018; Shoelson et al., 2006; Vigneri et al.,  
316 2020). Despite this our ability to tweak the cascade to restore balance between metabolic  
317 and mitogenic arms has been limited by paucity of information vis-à-vis parameters that  
318 govern network topology. In this study, using mathematical and experimental approaches,  
319 we have provided fundamental insights into kinetic parameters that dictate emergent  
320 properties of IS and its architecture, under various physiological contexts.

321           Given the contribution of the liver in maintaining whole organismal physiology and  
322 insulin action, including development of metabolic diseases, we have specifically utilized  
323 primary hepatocytes for deciphering kinetic constants or determinants that exert a control  
324 over IS. It should be noted that while it is nearly impossible to recreate paradigms that  
325 mirror in-vivo conditions, we have employed insulin treatment regimens that mimic normo-  
326 and hyper-insulinemic states. Moreover, in-vivo complexity of insulin-dependent endocrine  
327 and paracrine networks would severely confound attempts to unveil kinetic determinants.  
328 Our study has revealed novel insights into kinetic control of insulin signalling and also  
329 provides a model to capture such parameters in other cells or tissue types, including by  
330 coupling other endocrine/paracrine inputs.

331           While genetic, biochemical and pharmacological perturbations have described inter-  
332 dependence of IS phosphorylation events, recent phospho-proteomic analyses have  
333 unravelled their temporal behaviour. However, the extent to which phosphorylation  
334 dynamics encode information as a function of insulin concentration and/or time is still  
335 unclear. For example, even though hypo-/hyper-phosphorylations at T<sup>308</sup> and S<sup>473</sup> are  
336 considered as proxy markers for AKT activity and signalling downstream to insulin, whether  
337 or not their kinetic differentials contribute to insulin responsiveness remains unknown.  
338 Here, we surprisingly found that while the gain and kinetics of pT<sup>308</sup> (IR/PDK1 dependent)  
339 was independent of input strength, phosphorylation of S<sup>473</sup> (downstream to mTORC2)  
340 correlated with change in ligand concentration and displayed highest gain in signal in  
341 response to a fed insulin input.

342           Further, in contrast to net gain in specific phosphorylation, dynamic range, which is  
343 undetermined for many signalling networks including IS, has been proposed to be a better



344 predictor of cellular response. In this regard, our simulation and experimental data together  
345 revealed a large dynamic range for pAKT<sup>T308</sup> and pAKT<sup>S473</sup>, which was nearly overlapping.  
346 This suggests that both these phosphorylations are equally responsive to relative change in  
347 insulin inputs vis-à-vis physiological fed-fast cycles wherein circulating concentrations vary  
348 between 0.1nM and 1.0 nM. Surprisingly, we also found that pT<sup>308</sup> is a key determinant of  
349 network topology, which also highlights distinct properties of AKT phosphorylations in  
350 contributing to flow of information. Taken together these also raise the possibility of pT<sup>308</sup>  
351 and pS<sup>473</sup> acting as low pass and high pass filters with former being a permissive cue, which  
352 was hitherto unknown.

353         Noise in biology is generally regarded to be beneficial for regulating functional  
354 flexibility and has been well studied in the context of gene transcription. Given limited  
355 knowledge in this regard for signalling cascades (especially for IS), we checked for input  
356 versus variance in signal response for the nodal kinase AKT. It was interesting to note that  
357 noise in signaling was apparent at physiological concentrations of insulin (0.1-1 nM) while it  
358 was substantially diminished in hyper-insulinemic regimes. This hinted towards reduced  
359 flexibility in signaling under hyper-insulinemic states.

360         Signal stratification is crucial for sustenance of downstream information even upon  
361 input extinction. We discovered that signals are stratified with differential gating, in an  
362 insulin concentration dependent manner, with kinetic barriers/gates emerging at both low  
363 and hyper-insulinemic concentrations. These bring to the fore the need to address  
364 mechanisms that contribute to these kinetic barriers by affecting  $K_{ON}/K_{OFF}$  ratios of  
365 phosphorylation events, in the future. We propose such components would be very

366 attractive candidates for therapeutic interventions to regulate insulin signalling and  
367 maintain network properties.

368 In addition to differential kinetic gating, connectedness between signalling  
369 components determines topology of the network. Despite several studies on signalling  
370 cascades across biological systems, little is known about if/how these parameters contribute  
371 to topology, except in cases where simulations have been carried out for artificial signalling  
372 systems. Our iterative experimental-simulation approach has revealed that maximum  
373 connectivity between the signalling nodes, which is often used as a measure of network  
374 robustness, is achieved at physiological concentrations of insulin. Conversely, the network  
375 breaks at hyper-insulinemic states. Importantly, we also underscore the significance of each  
376 of the phosphorylations in maintaining the robustness of the topology under normo-  
377 insulinemic states.

378 Others and we have found that metabolic cues under fasting conditions elicit  
379 anticipatory molecular mechanisms to mount an efficient fed response (Chattopadhyay et  
380 al., 2020; Maniyadath et al., 2019; Shaw et al., 2020). Given that fasting insulin (0.1nM) is  
381 pulsatile with a frequency of 10-15min, our findings have shown that this rewires fed IS  
382 dynamics. Strikingly, we found that coupling low pulsatile inputs with 1.0nM insulin  
383 stimulation, as in the case of fasted to fed transition, enhanced net gain in phosphorylation  
384 of some (pAKT<sup>T308 and S473</sup> and pGSK3 $\beta$ <sup>S9</sup>) but not all components, akin to memory or  
385 anticipation. Conversely, insulin resistance is associated with repeated insulin/nutrient  
386 inputs and hyperinsulinemia. Our study also describes kinetic changes in IS dynamics, which  
387 can be either causal or consequential to reduced sensitivity under these conditions. Notably,  
388 we found that repeated stimulation with fed concentrations of insulin damped the AKT

389 response while upregulating pERK indicating a disbalance between metabolic and mitogenic  
390 arms. This is important because overactivation of either metabolic and/or the mitogenic  
391 arm has been described in literature as a driver of metabolic diseases and cancer (Altomare  
392 and Testa, 2005; Burotto et al., 2014; De Luca et al., 2012; Shaw and Cantley, 2006). Here,  
393 we would like to specifically highlight that the signaling network is most robust in response  
394 to fed insulin inputs, which is pulse primed by fasting insulin. Our findings posit that  
395 repeated and/or high insulin inputs, including in a clinical setting could lead to perturbed  
396 networks with possible pathological manifestations.

397 In conclusion, our results unravel hitherto unknown kinetic constraints that exert  
398 control over components of insulin signaling. Notably, we illustrate that these kinetic  
399 parameters are intrinsically linked to insulin concentrations as in normo- and hyper-  
400 insulinemic states. Given that a discordant signal flow between metabolic and growth-factor  
401 arms is associated with diseases, our findings provide fundamental insights into factors that  
402 govern this coupling. Our study also raises the possibility of impaired biological outputs in  
403 the context of therapeutic interventions using insulin, which have been largely guided by  
404 glycemic control. We highlight the importance of discovering novel regulatory  
405 parameters/nodes to complete our understanding of signaling cascades under both normal  
406 and pathological conditions.

407

## 408 **Materials and Methods**

### 409 **Animals**

410 2.5-3 month old C57BL/6NCr mice were used for hepatocyte isolation. The animals were  
411 housed under standard animal house conditions with a 12h day and night cycle. All

412 procedures were done in accordance with the institute animal ethics committee (IAEC)  
413 guidelines.

#### 414 **Primary Hepatocyte Isolation and culture**

415 Male mice were sedated by giving intraperitoneal Thiopentone (Neon Laboratories Ltd.,  
416 Mumbai, India) injection. Liver perfusion was done via inferior vena cava using 30mL Hank's  
417 Balanced Salt Solution, HBSS (5.33 mM Potassium chloride, 0.44 mM  $\text{KH}_2\text{PO}_4$ , 4.16 mM  
418  $\text{NaHCO}_3$ , 137.93 mM NaCl, 0.338 mM  $\text{Na}_2\text{HPO}_4$ , pH 7.4) containing 5.5 mM Glucose (Sigma-  
419 Aldrich G8769), 25mM HEPES pH 7.2 (USB 16926) and 100mM EGTA (Sigma-Aldrich E3889).  
420 Hepatic portal vein was cut at one end in order to drain out the blood. Perfused liver was  
421 digested using collagenase (Sigma-Aldrich C5138) dissolved in 50mL Digestion medium  
422 {DMEM-LG (Sigma-Aldrich D5523), 15mM HEPES pH 7.2 (USB 16926) and Anti-Anti (Sigma-  
423 Aldrich A5955)}. Liver was cut into pieces, minced and incubated in Digestion Medium for  
424 5min. The cells were strained using a 70 $\mu\text{m}$  cell strainer and centrifuged at 50G for 5min.  
425 Cell pellet was washed twice with DMEM-HG (Sigma-Aldrich D7777) and re-suspended in  
426 DMEM-HG containing 10% FBS (Gibco 16000044) for plating. Trypan blue staining was done  
427 to check cell viability. Cells were plated at a density of  $7.5 \times 10^5$  cells/60mm plate in collagen  
428 (Sigma-Aldrich C3867) coated plates (5 $\mu\text{g}/\text{cm}^2$ ). Cells were grown at 37°C and 5%  $\text{CO}_2$ .  
429 Medium was changed 6h post plating to ensure proper cell adherence.

#### 430 **Insulin Treatments**

431 24h post plating, the hepatocyte medium was changed to 5% FBS containing DMEM-HG for  
432 11h. Medium was changed to Earle's Balanced Salt Solution, EBSS (Sigma-Aldrich E2888) for  
433 6h to get a baseline (0m) signal. For one step insulin stimulation experiments, 0.1-100nM  
434 Insulin (Sigma-Aldrich I0516) in DMEM-HG was added to the hepatocytes and cells were

435 collected at time points as described in the results. For pulsatile insulin treatments and  
436 repeated insulin stimulation, paradigm modifications are mentioned in Figure 4A and 5A.  
437 Every media change was preceded with a PBS wash to remove residual contamination.

#### 438 **Protein Lysate Preparation**

439 Hepatocytes were lysed in RIPA lysis buffer (50mM Tris pH 8.0, 150mM NaCl, 0.1% SDS,  
440 0.5% Sodium deoxycholate, 1% Triton X-100, 0.1% SDS, 1 mM PMSF, Protease inhibitor  
441 cocktail and phosphatase inhibitor- Sigma-Roche 4906845001) for 30min. Cell debris were  
442 pelleted by centrifuging at 12,000rpm at 4°C for 15min. BCA assay kit (Sigma-Aldrich 9643)  
443 was used for protein estimation. Protein samples were boiled in a loading buffer (8% SDS,  
444 40% glycerol, 240mM Tris pH 6.8, 0.2g bromophenol blue and 3.05g DTT) and stored at -  
445 20°C.

#### 446 **Western Blotting**

447 50µg of protein was loaded onto SDS gel and run at 90V for stacking and 120V for resolving.  
448 Gels were transferred to ethanol activated PVDF membranes (Merck IPVH00010-IN) at 90V  
449 for 2h. Protein blotted membranes were blocked in 5% skimmed milk. Blots were cut  
450 according to protein molecular weight as indicated by pre-stained ladder (Abcam ab116028)  
451 and incubated overnight with the respective primary antibodies: AKT (CST 9272), pAKT<sup>S473</sup>  
452 (CST 4060), pAKT<sup>T308</sup> (CST 13038), ERK1/2 (CST 4695), pERK1/2<sup>T202/Y204</sup> (CST 4376), GSK3β  
453 (CST 12456), pGSK3β<sup>S9</sup> (CST 5558), pS6K<sup>T389</sup> (CST 9234) and S6K (CST 2708). Blots were  
454 incubated with appropriate secondary antibodies (Anti-Rabbit IgG- Peroxidase Sigma-Aldrich  
455 A0545 and Anti-Mouse IgG- Peroxidase Sigma-Aldrich A9044) and imaged using GE  
456 Amersham Imager 600.

457 **RNA extraction, cDNA synthesis and RT-PCR**

458 RNA extraction, cDNA synthesis and real time PCR was performed as per manufacturer's  
459 instructions. Briefly, total RNA was extracted from hepatocytes using TRIzol reagent  
460 (Ambion-Invitrogen 15596-018) and 1ug of RNA was used to make cDNA using SuperScript  
461 IV RT Kit (Invitrogen 18090010). Quantitative PCR was done using KAPA SYBR® FAST  
462 Universal 2X qPCR Master Mix (KAPA Biosystems KK4601) and LightCycler 96 instrument  
463 (Roche). The list of primers used are depicted in the table below:

| Gene Name | Forward Primer        | Reverse Primer           |
|-----------|-----------------------|--------------------------|
| FOS       | GTCAACACACAGGACTTTTG  | AGATAGCTGCTCTACTTTCA     |
| EGR1      | CACTGACATTTTTCTGAGC   | TAGTGGATAGTGGAGTGAGC     |
| c-JUN     | TACACGACTACAACTCCTG   | GGGGTAAAAGTACTGTCCC      |
| SRF       | GAGCCAGATCTCACCTACCAG | CTGACACTAGCAGACACTG      |
| ChREBP    | CATCTCCAGCCTCGTCTTC   | CTTGGTCTTAGGGTCTTCAGG    |
| LPK       | CTTGCTCTACCGTGAGCCTC  | ACCACAATCACCAGATCACC     |
| GLUT2     | GTCACTATGCTCTGGTCTCTG | CAAGAGGGCTCCAGTCAATG     |
| PEPCK     | GTTCCAGGGTGCATGAAAG   | AGGGCGAGTCTGTCAGTTCAA    |
| PPARG     | AGGGCGATCTTGACAGGAAA  | TCTCCATCATTAAAGGAATTCATG |
| SCD1      | CTGACCTGAAAGCCGAGAAG  | AGAAGGTGCTAACGAACAGG     |
| ACC       | AAGGCTATGTGAAGGATGTGG | CTGTCTGAAGAGGTTAGGGAAG   |
| CPT1A     | ACTCCGCTCGCTCATTCCG   | CACACCACCACCACGATAA      |
| GCK       | CAACTGGACCAAGGGCTTCAA | TGTGGCCACCGTGCATTC       |
| GLUT1     | CCCCCAGAAGGTTATTGAG   | CCAACAGGTTTCATCAGC       |

|            |                        |                        |
|------------|------------------------|------------------------|
| LDHA       | ACAGTTGTTGGGGTTGGTGC   | CGCAGTTACACAGTAGTCTTTG |
| Aldolase A | GCTATCAACAAGTGCCCCCT   | GCTGCCTTCAGGTTCTCCTT   |
| DGAT2      | CTGTGCTCTACTTCACCTGGCT | CTGGATGGGAAAGTAGTCTCGG |
| ACLY       | AGGAAGTGCCACCTCCAACAGT | CGCTCATCACAGATGCTGGTCA |
| LXRa       | CTGAAGCGGCAAGAAGAGGA   | CTGTGGCAGGACTTGAGGAG   |
| 18S        | TTTCGAGGCCCTGTAATTGG   | CCCAAGATCCAACACTACGAGC |

464

#### 465 **Data Processing**

466 Intensity measurements from the blots were done using Fiji-ImageJ software with  
467 corresponding background correction.

#### 468 **Network Analysis**

469 Network construction, visualization and analysis was performed using Cytoscape (version  
470 3.7.2) using Pearson correlation data obtained from GraphPad Prism (version 8).

#### 471 **Quantitation and Statistical Analysis**

472 Data are expressed as means  $\pm$  standard error of means (SEM). Statistical analyses were  
473 performed using Microsoft Excel (2013) and GraphPad Prism (version 8). Statistical  
474 significance was determined by the Student's t test. A value of  $p \leq 0.05$  was considered  
475 statistically significant. \* $p \leq 0.05$ ; \*\* $p \leq 0.01$ ; \*\*\* $p \leq 0.001$ .

#### 476 **Calculation of z-score and true/false discovery rate (TDR/FDR)**

477 Z-score was calculated by computing the difference between experimental and simulation  
478 for each time point. Like in a paired t-test or z-test, we computed the z-value by calculating  
479 the mean of the differences and dividing by the standard deviation. If  $z < 1.96$ , the null

480 hypothesis — that the experimental and simulation mean values are statistically the same  
481 was accepted. For computing FDR, difference between experimental and simulation data  
482 was divided by standard errors for different insulin concentrations and z-values were  
483 calculated.  $z > 1.96$  it is was rejected and counted as false discovery and further averaged to  
484 obtain the false discovery rate. For two different insulin concentrations, we define a true  
485 discovery rate, which is calculated by taking difference between mean values and dividing by root of  
486 sum of square of standard errors. If  $z > 1.96$ , the null hypothesis is rejected and counted as true  
487 discovery and averaged to obtain the true discovery rate.

#### 488 **Estimation of Parameters for Deterministic Simulations**

489 The proposed pathway of insulin signaling is modelled in terms of ordinary differential  
490 equations by using mass action kinetics (Alon, 2019; Klipp et al., 2016) . The set of equations  
491 that is used to define the insulin signaling network, which is considered both single (denoted  
492 by 'p') and double phosphorylation (denoted by 'pp') events and feedback inhibitions, are  
493 depicted in Figure S3. We have solved these sets of ordinary differential equations using  
494 MatLab version R2015b, Math Works. The parameters of the model (rate constants of  
495 reactions and initial amounts of proteins) were decided such that the model fitted with the  
496 experimental data. The constrained nonlinear optimization technique was implemented  
497 using the 'fmincon' function in MatLab to provide parameters that fit best with the available  
498 data. That is, we optimized (minimized) the function:

$$499 \quad S = \sum_{i,j} [E(i,j) - S(i,j)]^2$$

500 where,  $E(i, j)$  and  $S(i, j)$  are the experimental and simulation data, respectively, for the  $i^{\text{th}}$   
501 protein component at  $j^{\text{th}}$  time point. The function essentially measures the deviation of the  
502 experimental data, and is defined as the sum of the squares of the differences between



503 experimental measurements and simulated trajectories over all the measured proteins. We  
504 took 100 independent runs of the program to estimate these parameters. We choose the  
505 parameters that correspond to a minimum objective function value resulting in a good fit.  
506 All parameters were obtained for different insulin concentrations.

### 507 **Parameters used in Stochastic Simulations**

508 This reaction network is simulated by using the kinetic Monte Carlo based Doob-Gillespie  
509 Algorithm (Doob, 1942, 1945; Gillespie, 1976, 1977). The rate constants of respective  
510 reactions are taken from the deterministic model proposed earlier. These rate constants are  
511 converted to stochastic framework by using appropriate conversion factors. For  
512 unimolecular reactions, the deterministic rate constants ( $k_j$ ) and stochastic rate constants  
513 ( $c_j$ ) are numerically equal. For bimolecular reactions, when two reactants correspond to  
514 different proteins, the stochastic rate constants ( $c_j$ ) are equal to  $k_j/V$ , where  $V$  is the system  
515 volume (Gillespie, 1976, 1977). The concentration of proteins from a deterministic regime  
516 are converted to the number of proteins per cell by multiplying the concentrations by  $N_a \times$   
517  $V$ , where  $N_a$  is the Avogadro's number and  $V = 3 \times 10^{-12}$  liters is the estimated volume of a  
518 cell. During the simulation, in any particular iteration from a given reaction network a single  
519 bio-chemical reaction and the subsequent time step is chosen randomly. In this way, a single  
520 stochastic trajectory is generated by running the simulation for a desired time. Further,  
521 many more realizations of this trajectory are generated to compute different moments (e.g.  
522 mean, standard deviation) of the probability distributions.

523 Estimation of Insulin Molecules: To estimate the number of insulin molecules from  
524 concentration, we assumed a spherical shell (around the cell membrane) of 20nm size and  
525 computed the corresponding volume. Assuming a spherical cell of volume  $V = 3 \times 10^{-12}$  litres

526 the volume of this shell is  $\Delta V = 0.0199 \times 10^{-12}$  litres. Hence the number of insulin molecules  
527 are estimated by calculating  $N_a \times \Delta V$ , where  $N_a$  is the Avogadro's number.

528 (i) For 0.1 nM Insulin: the number of insulin molecules are found to be

529 1.1985 molecules per spherical shell (1 insulin per spherical shell)

530 (ii) For 1 nM Insulin: the number of insulin molecules are found to be

531 11.9857 molecules per spherical shell (12 insulin molecules per spherical shell)

532 (iii) For 10 nM Insulin: the number of insulin molecules are found to be

533 119.8577 molecules per spherical shell (120 insulin molecules per spherical shell)

#### 534 **Calculation of decay rate**

535 Decay times are calculated for dynamic protein concentrations measured and simulated in  
536 our studies by fitting an exponential function ( $e^{-kt}$ ) from the time point at which peak  
537 intensity is maximum to the final time point at which the intensity falls down.

#### 538 **Calculation of parameters in kinetic gating**

539 The kinetic gating in the signaling cascade is studied by taking the ratio of phosphorylation  
540 rate constant ( $K_{ON}$ ) and the de-phosphorylation rate constant ( $K_{OFF}$ ) of each biochemical  
541 reaction. In case of the degradation reactions, their rate constants are incorporated by  
542 averaging with the rate constants of appropriate reactions.

543

#### 544 **Acknowledgements**

545 We acknowledge Dr. Shital Suryavanshi, Dr. Kalidas Kohale and TIFR-Animal House staff for  
546 help with animal breeding and maintenance. This research has been supported by funds to

547 U.K.-S. {DAE-TIFR (Government of India grant - 12P0122), Department of Biotechnology  
548 (DBT, India grant BT/PR4972/AGR/36/714/2012) and Swarnajayanti fellowship (DST  
549 Government of India grant DST/SJF/LSA-02/2012-13)}, R.P. (DBT, India grant  
550 BT/HRD/NBA/39/12/2018-19) and S.K. (Department of Science and Technology, India  
551 under Science and Engineering Research Board (SERB) - National Post-doctoral Fellowship  
552 (NPDF) with file number: PDF/2017/002502). We also thank the members of UK lab, TIFR for  
553 useful discussions and constructive comments.

554 **Competing interests**

555 The authors declare that no competing interests exist.

556 **References**

557 Alon, U. (2019). An introduction to systems biology: design principles of biological circuits  
558 (CRC press).

559 Altomare, D.A., and Testa, J.R. (2005). Perturbations of the AKT signaling pathway in human  
560 cancer. *Oncogene* 24, 7455-7464.

561 Aoki, K., Kumagai, Y., Sakurai, A., Komatsu, N., Fujita, Y., Shionyu, C., and Matsuda, M.  
562 (2013). Stochastic ERK activation induced by noise and cell-to-cell propagation regulates cell  
563 density-dependent proliferation. *Molecular cell* 52, 529-540.

564 Arcidiacono, B., Iiritano, S., Nocera, A., Possidente, K., Nevolo, M.T., Ventura, V., Foti, D.,  
565 Chiefari, E., and Brunetti, A. (2012). Insulin resistance and cancer risk: an overview of the  
566 pathogenetic mechanisms. *Experimental diabetes research* 2012.

567 Arkun, Y. (2016). Dynamic Modeling and Analysis of the Cross-Talk between Insulin/AKT and  
568 MAPK/ERK Signaling Pathways. *PLoS One* 11, e0149684.

569 Behar, M., Dohlman, H.G., and Elston, T.C. (2007). Kinetic insulation as an effective  
570 mechanism for achieving pathway specificity in intracellular signaling networks. *Proceedings*  
571 *of the National Academy of Sciences* 104, 16146-16151.

572 Behar, M., Hao, N., Dohlman, H.G., and Elston, T.C. (2008). Dose-to-duration encoding and  
573 signaling beyond saturation in intracellular signaling networks. *PLoS Comput Biol* 4,  
574 e1000197.

575 Bertuzzi, A., Conte, F., Mingrone, G., Papa, F., Salinari, S., and Sinigalli, C. (2016). Insulin  
576 signaling in insulin resistance states and cancer: a modeling analysis. *PLoS one* 11, e0154415.

- 577 Borisov, N., Aksamitiene, E., Kiyatkin, A., Legewie, S., Berkhout, J., Maiwald, T.,  
578 Kaimachnikov, N.P., Timmer, J., Hoek, J.B., and Kholodenko, B.N. (2009). Systems-level  
579 interactions between insulin–EGF networks amplify mitogenic signaling. *Molecular systems*  
580 *biology* 5, 256.
- 581 Boucher, J., Kleinridders, A., and Kahn, C.R. (2014). Insulin receptor signaling in normal and  
582 insulin-resistant states. *Cold Spring Harbor perspectives in biology* 6, a009191.
- 583 Bowsher, C.G., Voliotis, M., and Swain, P.S. (2013). The fidelity of dynamic signaling by noisy  
584 biomolecular networks. *PLoS Comput Biol* 9, e1002965.
- 585 Burotto, M., Chiou, V.L., Lee, J.M., and Kohn, E.C. (2014). The MAPK pathway across  
586 different malignancies: a new perspective. *Cancer* 120, 3446-3456.
- 587 Cedersund, G., Roll, J., Ulfhielm, E., Danielsson, A., Tidefelt, H., and Strålfors, P. (2008).  
588 Model-based hypothesis testing of key mechanisms in initial phase of insulin signaling. *PLoS*  
589 *computational biology* 4, e1000096.
- 590 Chattopadhyay, T., Maniyadath, B., Bagul, H.P., Chakraborty, A., Shukla, N., Budnar, S.,  
591 Rajendran, A., Shukla, A., Kamat, S.S., and Kolthur-Seetharam, U. (2020). Spatiotemporal  
592 gating of SIRT1 functions by O-GlcNAcylation is essential for liver metabolic switching and  
593 prevents hyperglycemia. *Proceedings of the National Academy of Sciences* 117, 6890-6900.
- 594 Dalle Pezze, P., Ruf, S., Sonntag, A.G., Langelaar-Makkinje, M., Hall, P., Heberle, A.M., Navas,  
595 P.R., Van Eunen, K., Tölle, R.C., and Schwarz, J.J. (2016). A systems study reveals concurrent  
596 activation of AMPK and mTOR by amino acids. *Nature communications* 7, 1-19.
- 597 Dalle Pezze, P., Sonntag, A.G., Thien, A., Prentzell, M.T., Gödel, M., Fischer, S., Neumann-  
598 Haefelin, E., Huber, T.B., Baumeister, R., and Shanley, D.P. (2012). A dynamic network model

599 of mTOR signaling reveals TSC-independent mTORC2 regulation. *Science signaling* 5, ra25-  
600 ra25.

601 De Luca, A., Maiello, M.R., D'Alessio, A., Pergameno, M., and Normanno, N. (2012). The  
602 RAS/RAF/MEK/ERK and the PI3K/AKT signalling pathways: role in cancer pathogenesis and  
603 implications for therapeutic approaches. *Expert opinion on therapeutic targets* 16, S17-S27.

604 Di Camillo, B., Carlon, A., Eduati, F., and Toffolo, G.M. (2016). A rule-based model of insulin  
605 signalling pathway. *BMC systems biology* 10, 38.

606 Doob, J.L. (1942). Topics in the theory of Markoff chains. *Transactions of the American*  
607 *Mathematical Society* 52, 37-64.

608 Doob, J.L. (1945). Markoff chains--denumerable case. *Transactions of the American*  
609 *Mathematical Society* 58, 455-473.

610 Faro, J., Castro, M., and Molina-París, C. (2017). A unifying mathematical framework for  
611 experimental TCR-pMHC kinetic constants. *Scientific reports* 7, 46741.

612 Gillespie, D.T. (1976). A general method for numerically simulating the stochastic time  
613 evolution of coupled chemical reactions. *Journal of computational physics* 22, 403-434.

614 Gillespie, D.T. (1977). Exact stochastic simulation of coupled chemical reactions. *The journal*  
615 *of physical chemistry* 81, 2340-2361.

616 Guo, S. (2014). Insulin signaling, resistance, and the metabolic syndrome: insights from  
617 mouse models to disease mechanisms. *The Journal of endocrinology* 220, T1.

618 Haeusler, R.A., McGraw, T.E., and Accili, D. (2018). Biochemical and cellular properties of  
619 insulin receptor signalling. *Nature Reviews Molecular Cell Biology* 19, 31.

- 620 Hill, D., and Milner, R. (1985). Insulin as a growth factor. *Pediatric research* *19*, 879-886.
- 621 Ho, C.K., Rahib, L., Liao, J.C., Sriram, G., and Dipple, K.M. (2015). Mathematical modeling of  
622 the insulin signal transduction pathway for prediction of insulin sensitivity from expression  
623 data. *Molecular genetics and metabolism* *114*, 66-72.
- 624 Huang, C., Wu, M., Du, J., Liu, D., and Chan, C. (2014). Systematic modeling for the insulin  
625 signaling network mediated by IRS1 and IRS2. *Journal of theoretical biology* *355*, 40-52.
- 626 Humphrey, S.J., Azimifar, S.B., and Mann, M. (2015). High-throughput phosphoproteomics  
627 reveals in vivo insulin signaling dynamics. *Nature biotechnology* *33*, 990-995.
- 628 Klipp, E., Liebermeister, W., Wierling, C., and Kowald, A. (2016). *Systems biology: a textbook*  
629 (John Wiley & Sons).
- 630 Krishnan, N., Bonham, C.A., Rus, I.A., Shrestha, O.K., Gauss, C.M., Haque, A., Tocilj, A.,  
631 Joshua-Tor, L., and Tonks, N.K. (2018). Harnessing insulin-and leptin-induced oxidation of  
632 PTP1B for therapeutic development. *Nature communications* *9*, 1-17.
- 633 Krüger, M., Kratchmarova, I., Blagoev, B., Tseng, Y.-H., Kahn, C.R., and Mann, M. (2008).  
634 Dissection of the insulin signaling pathway via quantitative phosphoproteomics. *Proceedings*  
635 *of the National Academy of Sciences* *105*, 2451-2456.
- 636 Kubota, H., Noguchi, R., Toyoshima, Y., Ozaki, Y.-i., Uda, S., Watanabe, K., Ogawa, W., and  
637 Kuroda, S. (2012). Temporal coding of insulin action through multiplexing of the AKT  
638 pathway. *Molecular cell* *46*, 820-832.
- 639 Kubota, H., Uda, S., Matsuzaki, F., Yamauchi, Y., and Kuroda, S. (2018). In vivo decoding  
640 mechanisms of the temporal patterns of blood insulin by the insulin-AKT pathway in the  
641 liver. *Cell systems* *7*, 118-128. e113.

642 Lu, M., Wan, M., Leavens, K.F., Chu, Q., Monks, B.R., Fernandez, S., Ahima, R.S., Ueki, K.,  
643 Kahn, C.R., and Birnbaum, M.J. (2012). Insulin regulates liver metabolism in vivo in the  
644 absence of hepatic Akt and Foxo1. *Nature medicine* 18, 388-395.

645 Maniyadath, B., Chattopadhyay, T., Verma, S., Kumari, S., Kulkarni, P., Banerjee, K., Lazarus,  
646 A., Kokane, S.S., Shetty, T., and Anamika, K. (2019). Loss of hepatic oscillatory fed microRNAs  
647 abrogates refeed transition and causes liver dysfunctions. *Cell reports* 26, 2212-2226. e2217.

648 Manning, B.D., and Toker, A. (2017). AKT/PKB signaling: navigating the network. *Cell* 169,  
649 381-405.

650 Mendoza, M.C., Er, E.E., and Blenis, J. (2011). The Ras-ERK and PI3K-mTOR pathways: cross-  
651 talk and compensation. *Trends in biochemical sciences* 36, 320-328.

652 Menge, B.A., Grüber, L., Jørgensen, S.M., Deacon, C.F., Schmidt, W.E., Veldhuis, J.D., Holst,  
653 J.J., and Meier, J.J. (2011). Loss of inverse relationship between pulsatile insulin and  
654 glucagon secretion in patients with type 2 diabetes. *Diabetes* 60, 2160-2168.

655 Noguchi, R., Kubota, H., Yugi, K., Toyoshima, Y., Komori, Y., Soga, T., and Kuroda, S. (2013).  
656 The selective control of glycolysis, gluconeogenesis and glycogenesis by temporal insulin  
657 patterns. *Molecular systems biology* 9, 664.

658 O'Meara, N.M., Sturis, J., Van Cauter, E., and Polonsky, K.S. (1993). Lack of control by  
659 glucose of ultradian insulin secretory oscillations in impaired glucose tolerance and in non-  
660 insulin-dependent diabetes mellitus. *The Journal of clinical investigation* 92, 262-271.

661 O'Rahilly, S., Turner, R.C., and Matthews, D.R. (1988). Impaired pulsatile secretion of insulin  
662 in relatives of patients with non-insulin-dependent diabetes. *New England Journal of*  
663 *Medicine* 318, 1225-1230.



- 664 Petersen, M.C., and Shulman, G.I. (2018). Mechanisms of insulin action and insulin  
665 resistance. *Physiological reviews* *98*, 2133-2223.
- 666 Pørksen, N. (2002). The in vivo regulation of pulsatile insulin secretion. *Diabetologia* *45*, 3-  
667 20.
- 668 Saltiel, A.R., and Kahn, C.R. (2001). Insulin signalling and the regulation of glucose and lipid  
669 metabolism. *Nature* *414*, 799-806.
- 670 Sarbassov, D.D., Guertin, D.A., Ali, S.M., and Sabatini, D.M. (2005). Phosphorylation and  
671 regulation of Akt/PKB by the rictor-mTOR complex. *Science* *307*, 1098-1101.
- 672 Satin, L.S., Butler, P.C., Ha, J., and Sherman, A.S. (2015). Pulsatile insulin secretion, impaired  
673 glucose tolerance and type 2 diabetes. *Molecular aspects of medicine* *42*, 61-77.
- 674 Schmelzle, K., Kane, S., Gridley, S., Lienhard, G.E., and White, F.M. (2006). Temporal  
675 dynamics of tyrosine phosphorylation in insulin signaling. *Diabetes* *55*, 2171-2179.
- 676 Sedaghat, A.R., Sherman, A., and Quon, M.J. (2002). A mathematical model of metabolic  
677 insulin signaling pathways. *American Journal of Physiology-Endocrinology and Metabolism*  
678 *283*, E1084-E1101.
- 679 Shaw, E., Talwadekar, M., Rashida, Z., Mohan, N., Acharya, A., Khatri, S., Laxman, S., and  
680 Kolthur-Seetharam, U. (2020). Anabolic SIRT4 Exerts Retrograde Control over TORC1  
681 Signaling by Glutamine Sparing in the Mitochondria. *Molecular and Cellular Biology* *40*.
- 682 Shaw, R.J., and Cantley, L.C. (2006). Ras, PI (3) K and mTOR signalling controls tumour cell  
683 growth. *Nature* *441*, 424-430.

684 Shimobayashi, M., Albert, V., Woelnerhanssen, B., Frei, I.C., Weissenberger, D., Meyer-  
685 Gerspach, A.C., Clement, N., Moes, S., Colombi, M., and Meier, J.A. (2018). Insulin resistance  
686 causes inflammation in adipose tissue. *The Journal of clinical investigation* *128*, 1538-1550.

687 Shinar, G., Milo, R., Martínez, M.R., and Alon, U. (2007). Input–output robustness in simple  
688 bacterial signaling systems. *Proceedings of the National Academy of Sciences* *104*, 19931-  
689 19935.

690 Shoelson, S.E., Lee, J., and Goldfine, A.B. (2006). Inflammation and insulin resistance. *The*  
691 *Journal of clinical investigation* *116*, 1793-1801.

692 Silva-Rocha, R., and de Lorenzo, V. (2010). Noise and robustness in prokaryotic regulatory  
693 networks. *Annual review of microbiology* *64*, 257-275.

694 Somvanshi, P.R., Tomar, M., and Kareenhalli, V. (2019). computational Analysis of insulin-  
695 Glucagon Signalling network: implications of Bistability to Metabolic Homeostasis and  
696 Disease states. *Scientific reports* *9*, 1-11.

697 Sonntag, A.G., Dalle Pezze, P., Shanley, D.P., and Thedieck, K. (2012). A modelling–  
698 experimental approach reveals insulin receptor substrate (IRS)-dependent regulation of  
699 adenosine monosphosphate-dependent kinase (AMPK) by insulin. *The FEBS journal* *279*,  
700 3314-3328.

701 Thattai, M., and Van Oudenaarden, A. (2001). Intrinsic noise in gene regulatory networks.  
702 *Proceedings of the National Academy of Sciences* *98*, 8614-8619.

703 Vander Haar, E., Lee, S.-i., Bandhakavi, S., Griffin, T.J., and Kim, D.-H. (2007). Insulin  
704 signalling to mTOR mediated by the Akt/PKB substrate PRAS40. *Nature cell biology* *9*, 316-  
705 323.

706 Vigneri, R., Sciacca, L., and Vigneri, P. (2020). Rethinking the Relationship between Insulin  
707 and Cancer. *Trends in Endocrinology & Metabolism*.

708 Vinayagam, A., Kulkarni, M.M., Sopko, R., Sun, X., Hu, Y., Nand, A., Villalta, C., Moghimi, A.,  
709 Yang, X., and Mohr, S.E. (2016). An integrative analysis of the InR/PI3K/Akt network  
710 identifies the dynamic response to insulin signaling. *Cell reports* *16*, 3062-3074.

711 Vinod, P.K.U., and Venkatesh, K.V. (2009). Quantification of the effect of amino acids on an  
712 integrated mTOR and insulin signaling pathway. *Molecular BioSystems* *5*, 1163-1173.

713 Wilson, M.Z., Ravindran, P.T., Lim, W.A., and Toettcher, J.E. (2017). Tracing information flow  
714 from Erk to target gene induction reveals mechanisms of dynamic and combinatorial  
715 control. *Molecular cell* *67*, 757-769. e755.

716 Yugi, K., Kubota, H., Toyoshima, Y., Noguchi, R., Kawata, K., Komori, Y., Uda, S., Kunida, K.,  
717 Tomizawa, Y., and Funato, Y. (2014). Reconstruction of insulin signal flow from  
718 phosphoproteome and metabolome data. *Cell reports* *8*, 1171-1183.

719 Zhao, G., Wirth, D., Schmitz, I., and Meyer-Hermann, M. (2017). A mathematical model of  
720 the impact of insulin secretion dynamics on selective hepatic insulin resistance. *Nature*  
721 *communications* *8*, 1-10.

722

723 **Figure Legends**

724 **Figure 1: Iterative experimental-mathematical approach reveals distinct insulin signaling**

725 **kinetics**

726 (A) Schematic of the insulin/IGF signaling pathway. Components involved in metabolic and  
727 mitogenic arms are shown in blue and green, respectively. Phosphorylations measured in  
728 this study are highlighted in red. (B) Experimental paradigm and workflow for assaying  
729 signaling in response to one step stimulation. (C) Representative blots for levels of  
730 pAKT<sup>T308</sup> and pAKT<sup>S473</sup> following insulin stimulation, as indicated. Total AKT and actin were  
731 used for normalization. See more in Figure 1- figure supplement 1E-F and 2A-B. (D) and  
732 (E) Quantitation for temporal changes in pAKT<sup>S473</sup> (D) and pAKT<sup>T308</sup> (E) from experimental  
733 data shown in C. Fold changes for each concentration are with respect to their own 0m  
734 time point. Data presented is mean  $\pm$  s.e.m. (N=4, n=4). (F) and (G) Quantitation for  
735 temporal changes in pAKT<sup>S473</sup> (F) and pAKT<sup>T308</sup> (G) from mathematical simulations using  
736 differential equations. (H) Kinetic behavior of phosphorylated pAKT<sup>T308</sup> and  
737 pAKT<sup>S473</sup> molecules at 1 nM insulin from stochastic simulations. The band represents  
738 standard deviation. (I) z-score giving degree of concordance between simulated and  
739 experimental data.

740 **Figure 2: Continuous variable parameters and high/low pass filters determine**  
741 **concentration dependent insulin response**

742 (A) Extent of change in phosphorylation at pAKT<sup>T308</sup> and pAKT<sup>S473</sup> across time points  
743 between 0.1 and 1 nM insulin. (B) Phase diagram depicting relationship between  
744 peak intensity and decay time from simulated data. (C) Estimated peak amplitude for

745 signaling components as a function of varying insulin concentrations depicts dynamic range.

746 (D) Dynamic range for signaling components computed from (C), as labeled.

747 **Figure 3: Kinetic gates and maximum connectedness is associated with robust topology**

748 **under normo-insulinemic states**

749 (A)  $K_{ON}/K_{OFF}$  ratios for phosphorylations across the signaling cascade. Insulin concentrations

750 of 0.1-10 nM are depicted separately. Numbers on the x-axis represent phosphorylation

751 events as detailed in Figure 3 – figure supplement 1A. Yellow band refers to the kinetic

752 barrier applied between 0.1-10, representing a 10-fold change. (B) Noise in signal for

753 phosphorylation at pAKT<sup>T308</sup> and pAKT<sup>S473</sup> in response to different insulin concentrations, as

754 indicated. (C) Correlation matrix depicts degree of relatedness between phosphorylation

755 events and their evolution with increasing insulin concentration. (D) Network analysis

756 depicting degree of connectedness across insulin concentrations, as indicated. Dashed line

757 represents negative correlation. Significance in correlation: White ( $p < 0.05$ ) < Blue ( $p < 0.005$ )

758 < Green ( $p < 0.0005$ ) < Yellow ( $p < 0.00001$ ) as observed by Student's t-test. (E) Number of

759 edges and nodes in a 1 nM network substituted with 10 nM values, as indicated. (F)

760 Network maps of 1 nM insulin perturbed with 10 nM pAKT<sup>T308</sup> (a) and pAKT<sup>S473</sup> (b)

761 **Figure 4: Pulsatile fasting insulin rewires response to fed insulin inputs akin to memory**

762 (A) Experimental paradigm for mimicking fasted and fed insulin stimulation. P1-P4 indicate

763 0.1 nM insulin pulses. (B-D) Quantitation for temporal changes in phosphorylations at

764 pAKT<sup>T308</sup> (B), pAKT<sup>S473</sup> (C) and pERK<sup>T202/Y204</sup> (D) following insulin treatment as in A. Fold

765 changes for each concentration are with respect to their own 0m time point. Data

766 presented is mean  $\pm$  s.e.m. (N=4). (E) Network analysis showing connectivity among

767 signaling components after treatment with 1 nM insulin following fasted insulin inputs, as in

768 A. Dashed line represents negative correlation. Significance in correlation: White ( $p < 0.05$ )

769 <Blue ( $p < 0.005$ ) <Green ( $p < 0.0005$ ) <Yellow ( $p < 0.00001$ ) as observed by Student's t-test. (F)  
770 Heat maps for changes in gene expression downstream to insulin signaling in response to  
771 constant 0.1 nM and 1 nM, and 1 nM insulin following fasted insulin inputs (1 nM adapted,  
772 as in A) (N=2, n=3)

773 **Figure 5: Repeated stimulation by fed insulin abrogates the synergy between the**  
774 **metabolic and mitogenic arms of signaling**

775 (A) Experimental paradigm for repeated stimulation with 1nM insulin. (B-D) Quantitation for  
776 temporal changes in phosphorylations at pAKT<sup>T308</sup> (B), pAKT<sup>S473</sup> (C) and pERK<sup>T202/Y204</sup> (D)  
777 following repeated insulin stimulation. Fold changes for each concentration are with  
778 respective to their own 0m time point. Data presented is mean  $\pm$  s.e.m. (N=4). (E) Network  
779 analysis showing connectivity among signaling components after repeated insulin  
780 stimulation, as in A. Dashed line represents negative correlation. Significance in correlation:  
781 White ( $p < 0.05$ ) <Blue ( $p < 0.005$ ) <Green ( $p < 0.0005$ ) <Yellow ( $p < 0.00001$ ) as observed by  
782 Student's t-test. (F) Heat maps for changes in gene expression downstream to insulin  
783 signaling in response to repeated insulin stimulation (N=2, n=3)

784 **Figure 1 – figure supplement 1:**

785 (A-B) Normalization controls to correct for baseline signal. Representative samples were  
786 loaded to ensure that zero-minute time points across experiments were similar. (B) was  
787 over-exposed to get signal at zero minute. (C) Control for experimental paradigm to score  
788 for insulin inputs. Treatment with only high/low glucose and amino acid containing culture  
789 medium does not activate AKT signaling and indicates that the changes in phosphorylation  
790 are insulin dependent. (D) Quantitation for temporal changes in phosphorylations for C. (E  
791 and F) Representative blots for levels of pERK<sup>T202/Y204</sup>, pS6K<sup>T389</sup> and pGSK3 $\beta$ <sup>S9</sup> following

792 insulin stimulation of 0.1 and 1 nM, as indicated. Respective total proteins and actin were  
793 used for normalization

794 **Figure 1 – figure supplement 2**

795 (A and B) Representative blots for levels of pERK<sup>T202/Y204</sup>, pS6K<sup>T389</sup> and pGSK3β<sup>S9</sup> following  
796 insulin stimulation of 10 and 100 nM, as indicated. Respective total proteins and actin were  
797 used for normalization. (C) Comparison of area under the curve (AUC) with increasing insulin  
798 concentration. Asterisk depicts p values (\*p<0.05, \*\*p<0.005 and \*\*\*p<0.0005) as observed  
799 by Student's t-test. (D) True discovery rates computed across insulin concentrations, see  
800 methods.

801 **Figure 1 – figure supplement 3**

802 (A-C) Quantitation for temporal changes in pGSK3β<sup>S9</sup>(A), pS6K<sup>T389</sup> (B) and pERK<sup>T202/Y204</sup> (C)  
803 from experimental data shown in Figure 1 – figure supplement 1E-F and 2A-B. Fold changes  
804 for each concentration are with respect to their own 0m time point. Data presented is  
805 mean ± s.e.m. (N=4, n=4). (D-F) Quantitation for temporal changes in pGSK3β<sup>S9</sup> (D),  
806 pS6K<sup>T389</sup> (E) and pERK<sup>T202/Y204</sup> (F) from mathematical simulations using differential equations.  
807 (G) Simulated temporal changes in pIR, pmTORC1 and pmTORC2 following insulin  
808 stimulation, as indicated. (H) False discovery rates giving degree of concordance between  
809 simulated and experimental data, see methods

810 **Figure 2 – figure supplement 1**

811 (A) Representative blots for level of pAKT<sup>S473</sup> kinetics under insulin concentrations of 0.3 and  
812 0.6 nM. Total AKT and actin were used for normalization. (B) Concordance between  
813 experimental and simulated data for extent of phosphorylation at pAKT<sup>S473</sup> following  
814 stimulation by intermediate insulin concentrations. (C) Estimated final amplitude for  
815 signaling components at 120m as a function of varying insulin concentrations

816 **Figure 3 – figure supplement 1**

817 (A) Reactions corresponding to numbers on y-axis in Figure 3A. (B) Ordinary differential  
818 equations corresponding to reactions mentioned in A. (C) Pearson r and corresponding p  
819 values used for computing networks in Figure 3D. and Figure 3- figure supplement 2

820 **Figure 3 – figure supplement 2**

821 Pearson r and corresponding p values used for computing networks in Figure 3F and Figure  
822 3- figure supplement 3

823 **Figure 3 – figure supplement 3**

824 (A) Network maps of 1 nM insulin perturbed with 10 nM pAKT<sup>T308 and S473</sup> (a), pERK<sup>T202/Y204</sup> (b),  
825 pGSK3b<sup>S9</sup> (c) and pS6K<sup>T389</sup> (d). (B) Number of edges and nodes in a 0.1 nM network  
826 substituted with 10 nM values, as indicated. (C) Network maps of 0.1 nM insulin perturbed  
827 with 10 nM pAKT<sup>T308</sup> (a) and pAKT<sup>S473</sup> (b). (D) Network maps of 0.1 nM insulin perturbed  
828 with 10 nM pAKT<sup>T308 and S473</sup> (a), pERK<sup>T202/Y204</sup> (b), pGSK3b<sup>S9</sup> (c) and pS6K<sup>T389</sup> (d).

829 **Figure 4 – figure supplement 1**

830 (A-D) Representative blots for levels of pAKT<sup>T308</sup> (A), pAKT<sup>S473</sup> (A), pERK<sup>T202/Y204</sup> (B),  
831 pS6K<sup>T389</sup> (C) and pGSK3β<sup>S9</sup> (D) following pulsatile insulin stimulation, as indicated in Figure  
832 4A. Respective total proteins and actin were used for normalization kinetics. (E and F)  
833 Quantitation for temporal changes in phosphorylations at pGSK3β<sup>S9</sup> (E) and pS6K<sup>T389</sup> (F)  
834 following insulin pulses. Fold changes for each concentration are with respect to their  
835 own 0m time point. Data presented is mean ± s.e.m. (N=4)

836 **Figure 5 – figure supplement 1**

837 (A-D) Representative blots for levels of pAKT<sup>T308</sup> (A), pAKT<sup>S473</sup> (A), pERK<sup>T202/Y204</sup> (B),  
838 pS6K<sup>T389</sup> (C) and pGSK3β<sup>S9</sup> (D) following repeated insulin stimulation, as indicated in Figure  
839 5A. Respective total proteins and actin were used for normalization kinetics. (E and F)



840 Quantitation for temporal changes in phosphorylations at pGSK3 $\beta$ <sup>S9</sup> (E) and pS6K<sup>T389</sup> (F)  
841 following repeated insulin stimulation. Fold changes for each concentration are with  
842 respective to their own 0m time point. Data presented is mean  $\pm$  s.e.m. (N=4).

843 **Source Data**

844 **Figure 1 – source data 1:** Blot intensity and quantitation for pAKT<sup>S473</sup> and pAKT<sup>T308</sup>

845 **Figure 1 – source data 2:** Values for pAKT<sup>S473</sup> and pAKT<sup>T308</sup> from deterministic simulations  
846 used for plotting Figure 1F-G

847 **Figure 1 – source data 3:** Values for pAKT<sup>S473</sup> from stochastic simulations used for plotting  
848 Figure 1H

849 **Figure 1 – source data 4:** z-score computation for concordance between simulated and  
850 experimental data

851 **Figure 1 – figure supplement 1 – source data 1:** Blot intensity and quantitation for Figure 1 -  
852 figure supplement 1C-D

853 **Figure 1 – figure supplement 2 – source data 1:** Calculations for computing area under the  
854 curve

855 **Figure 1 – figure supplement 2 – source data 2:** TDR computation for comparison across  
856 insulin concentration

857 **Figure 1 – figure supplement 3 – source data 1:** Blot intensity and quantitation for  
858 pGSK3 $\beta$ <sup>S9</sup>, pS6K<sup>T389</sup> and pERK<sup>T202/Y204</sup> used for plotting Figure 1 – figure supplement 3A-C

859 **Figure 1 – figure supplement 3 – source data 2:** Values for pGSK3 $\beta$ <sup>S9</sup>, pS6K<sup>T389</sup> and  
860 pERK<sup>T202/Y204</sup> from deterministic simulations used for plotting Figure 1 – figure supplement  
861 3D-F

862 **Figure 1 – figure supplement 3 – source data 3:** Values for pIR, pmTORC1 and pmTORC2  
863 from deterministic simulations used for plotting Figure 1 – figure supplement 3G

864 **Figure 1 – figure supplement 3 – source data 4:** FDR calculations for degree of concordance  
865 between simulated and experimental data

866 **Figure 2 – source data 1:** Percentage gain computation w.r.t. Figure 2A

867 **Figure 2 – source data 2:** Values for peak intensity and decay time used for plotting Figure

868 2B

869 **Figure 2 – source data 3:** Values for peak intensity used to plot Figure 2C

870 **Figure 2 – source data 4:** Computation of dynamic range for Figure 2D

871 **Figure 2 – figure supplement 1 – source data 1:** Blot intensity and quantitation for extent of

872 phosphorylation at pAKT<sup>S473</sup> following stimulation by intermediate insulin concentrations in

873 Figure 2- figure supplement 1A-B

874 **Figure 2 – figure supplement 1 – source data 2:** Values for final intensity at 120min. used to

875 plot Figure 2- figure supplement 1C

876 **Figure 3 – source data 1:**  $K_{ON}/K_{OFF}$  used for plotting Figure 3A

877 **Figure 3 – source data 2:** Coefficient of variation used for plotting Figure 3B

878 **Figure 3 – source data 3:** Computations for Pearson r and statistical significance used to

879 construct Figure 3C

880 **Figure 3 – source data 4:** Values for edges and nodes corresponding to Figure 3E and

881 Figure3- figure supplement 3B

882 **Figure 3 – figure supplement 1 – source data 1:** Rate constants corresponding to equations

883 in Figure 3- figure supplement

884 **Figure 4 – source data 1:** Blot intensity and quantitation for extent of phosphorylation at

885 pAKT<sup>S473</sup>, pAKT<sup>T308</sup> and pERK<sup>T202/Y204</sup> corresponding to Figure 4B-D

886 **Figure 4 – source data 2:** Computations for Pearson r and statistical significance used to

887 construct Figure 4E

888

889 **Figure 4 – source data 3:** Ct values for changes in gene expression corresponding to Figure

890 4F

891 **Figure 4 – figure supplement 1 – source data 1:** Blot intensity and quantitation for extent of  
892 phosphorylation at pGSK3 $\beta$ <sup>S9</sup> and pS6K<sup>T389</sup> corresponding to Figure 4- figure supplement 1E-  
893 F

894 **Figure 5 – source data 1:** Blot intensity and quantitation for extent of phosphorylation at  
895 pAKT<sup>S473</sup>, pAKT<sup>T308</sup> and pERK<sup>T202/Y204</sup> corresponding to Figure 5B-D

896 **Figure 5 – source data 2:** Computations for Pearson r and statistical significance used to  
897 construct Figure 5E

898 **Figure 5 – source data 3:** Ct values for changes in gene expression corresponding to Figure  
899 5F

900 **Figure 5 – figure supplement 1 – source data 1:** Blot intensity and quantitation for extent of  
901 phosphorylation at pGSK3 $\beta$ <sup>S9</sup> and pS6K<sup>T389</sup> corresponding to Figure 5- figure supplement 1B-  
902 C

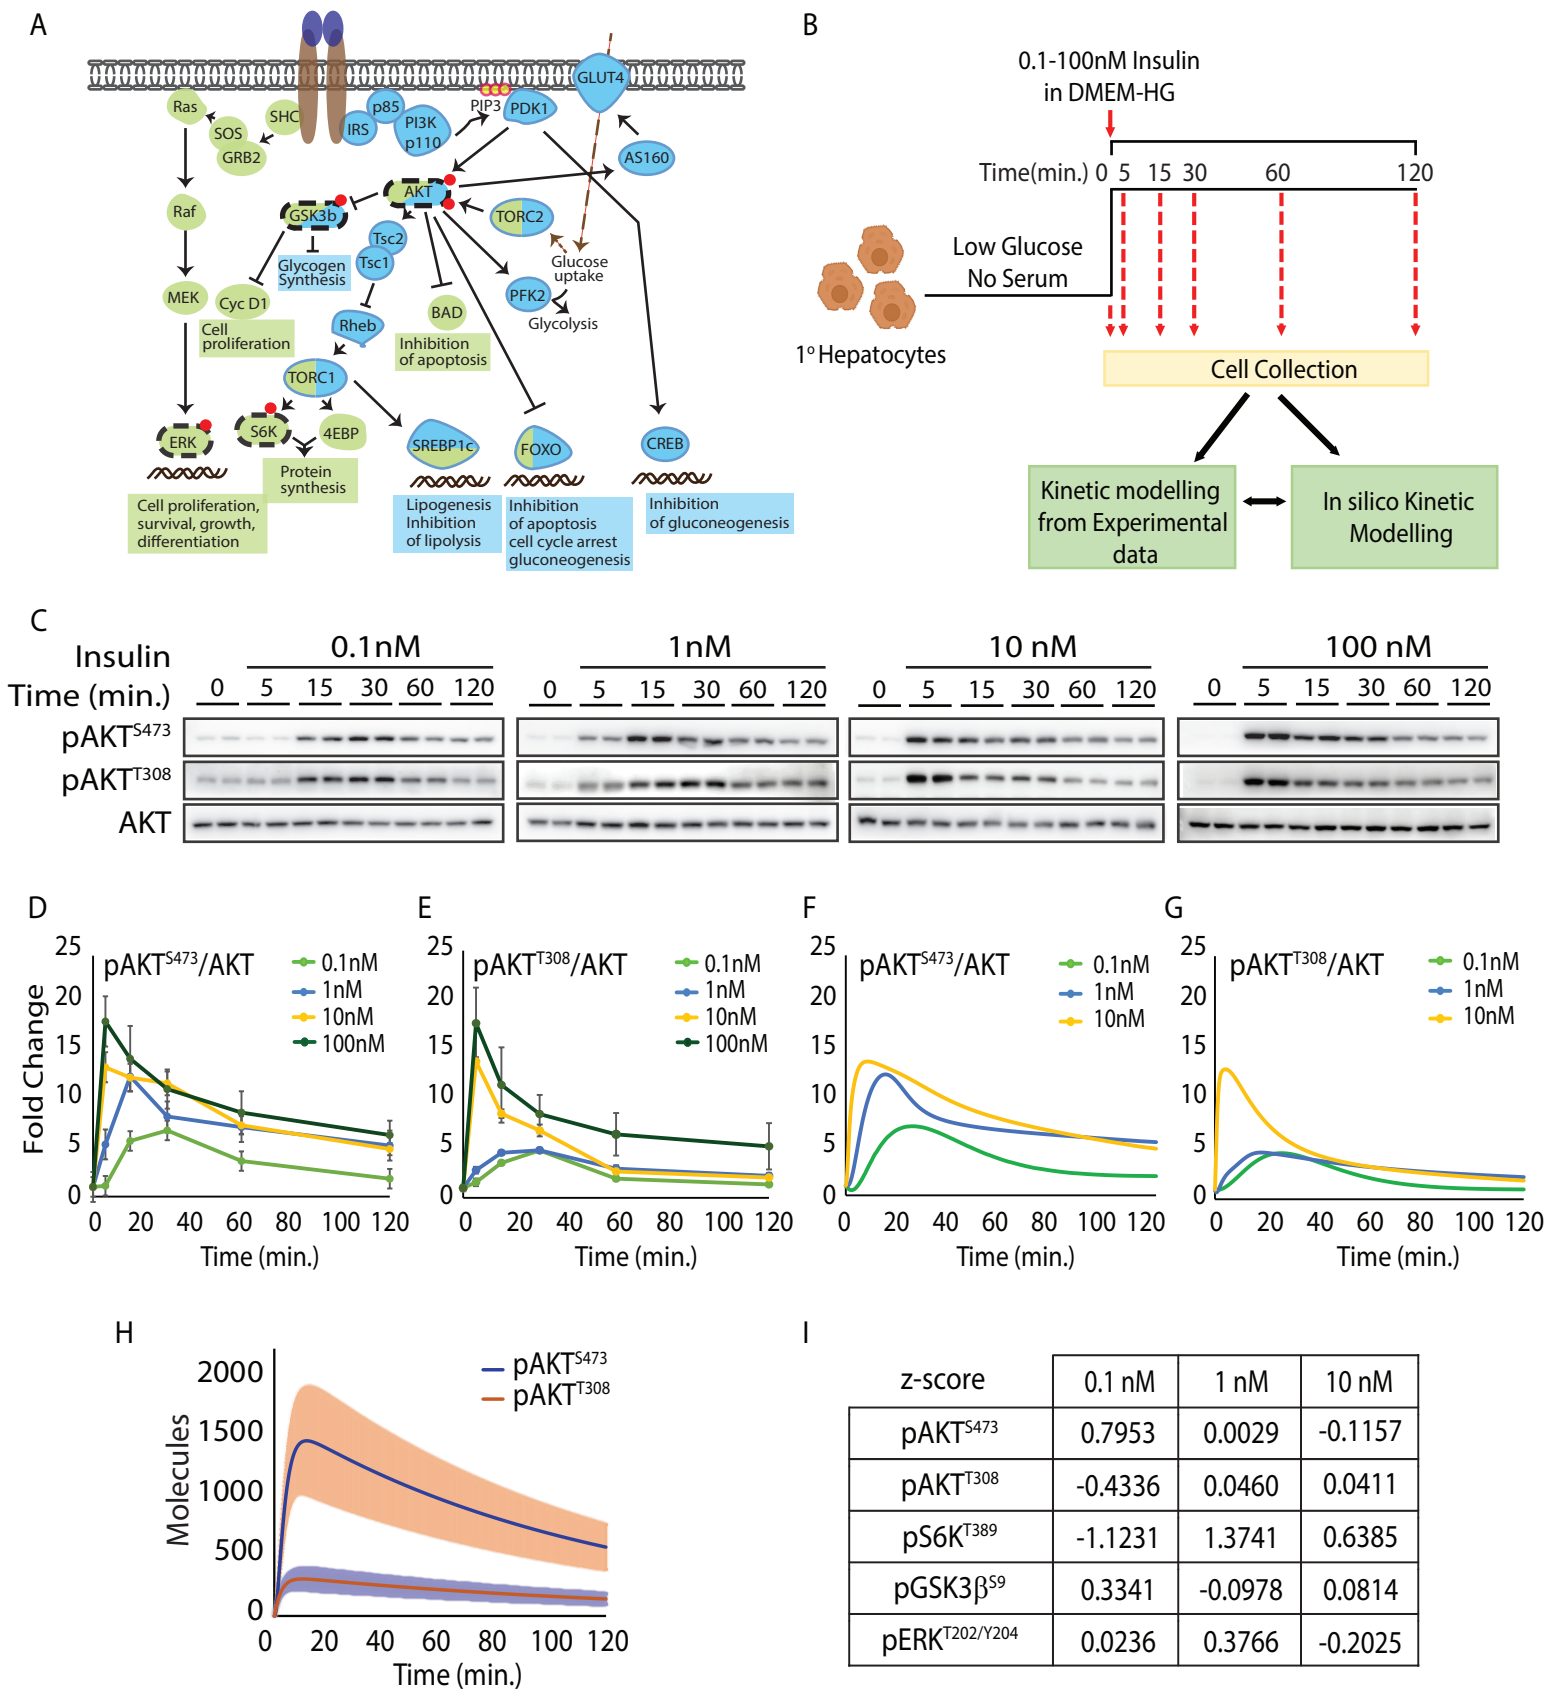

Figure 1

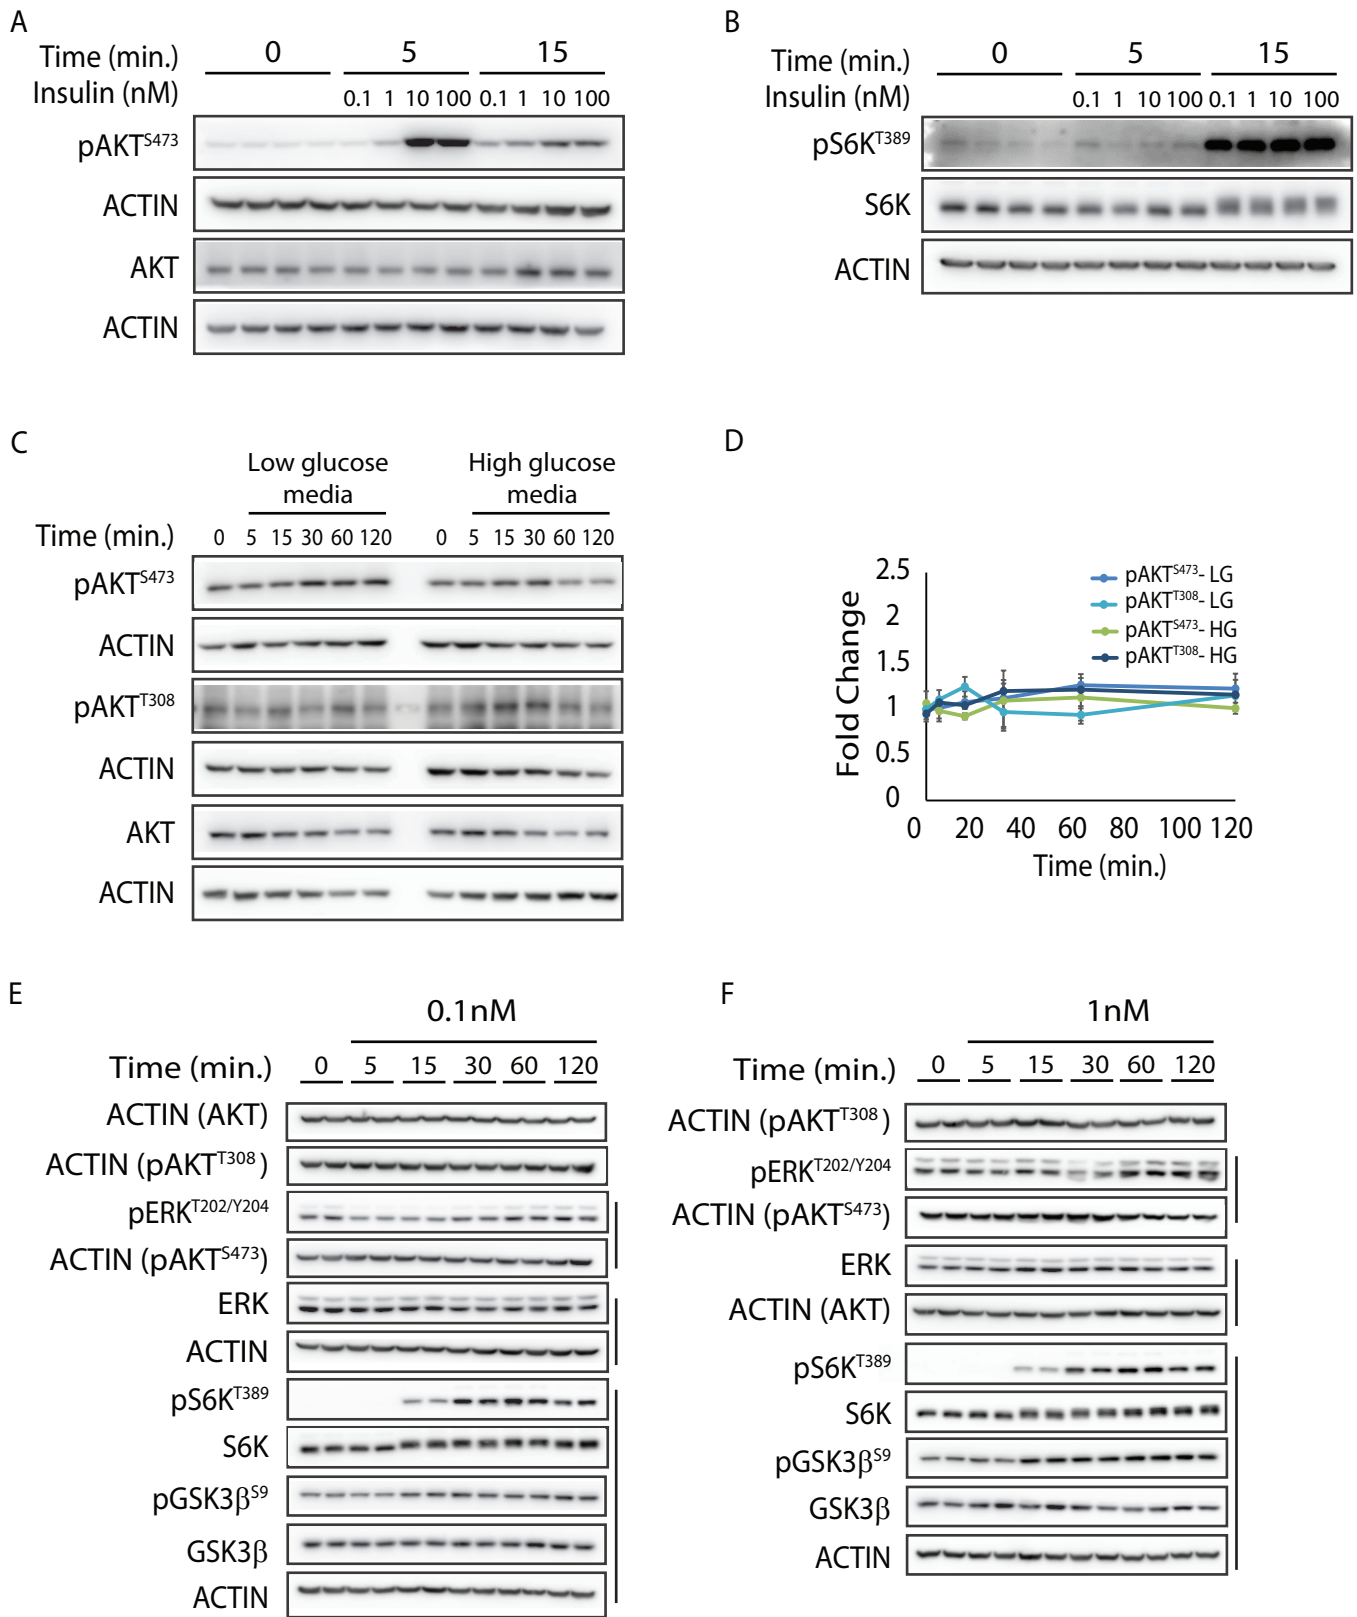

Figure 1 - figure supplement 1

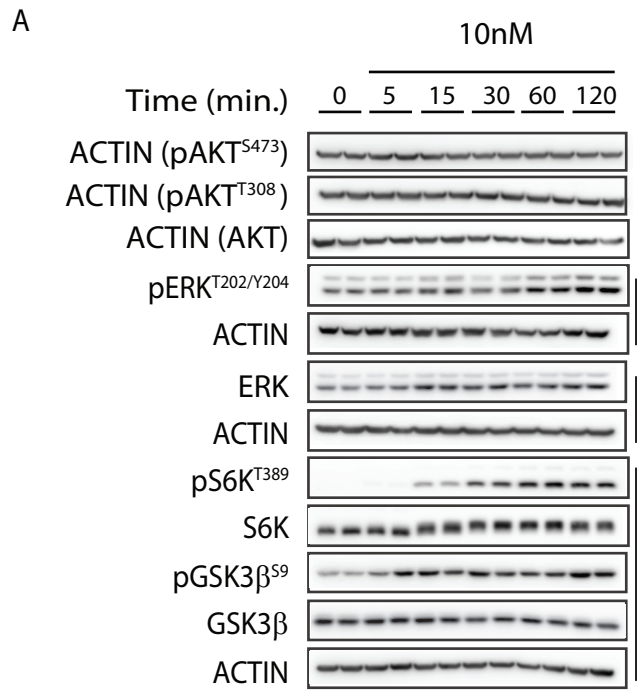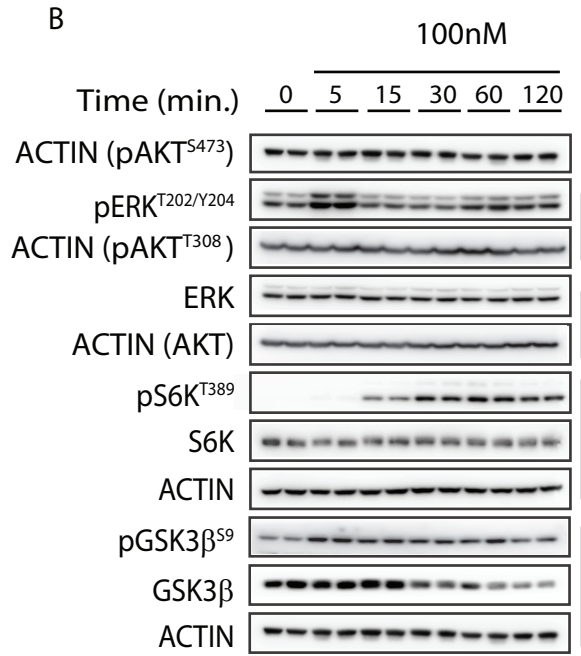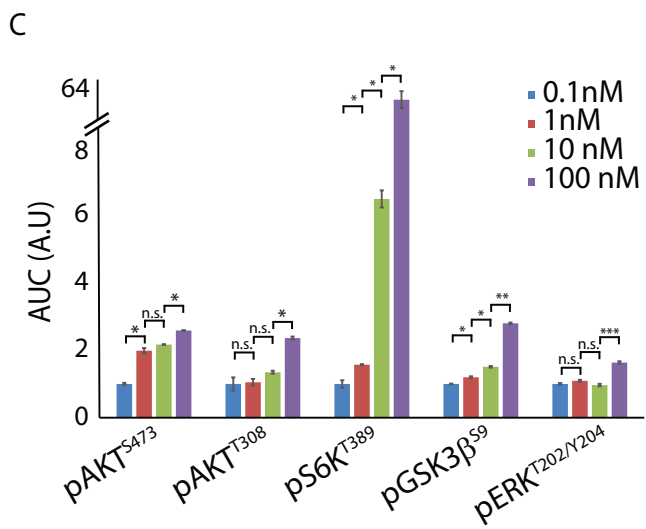

**D**

| TDR                       | 0.1nM vs. 1nM | 0.1nM vs. 10nM | 0.1nM vs. 100nM | 1nM vs. 10nM | 1nM vs. 100nM | 10nM vs. 100nM |
|---------------------------|---------------|----------------|-----------------|--------------|---------------|----------------|
| pAKT <sup>S473</sup>      | 0.8           | 1              | 1               | 0.4          | 0.2           | 0              |
| pAKT <sup>T308</sup>      | 0.8           | 1              | 0.6             | 0.6          | 0.2           | 0              |
| pS6K <sup>T389</sup>      | 1             | 1              | 1               | 1            | 1             | 0.2            |
| pGSK3β <sup>S9</sup>      | 0.8           | 1              | 1               | 0.4          | 0.2           | 0.2            |
| pERK <sup>T202/Y204</sup> | 0.8           | 1              | 1               | 0.4          | 0.2           | 0.2            |

Figure 1 - figure supplement 2

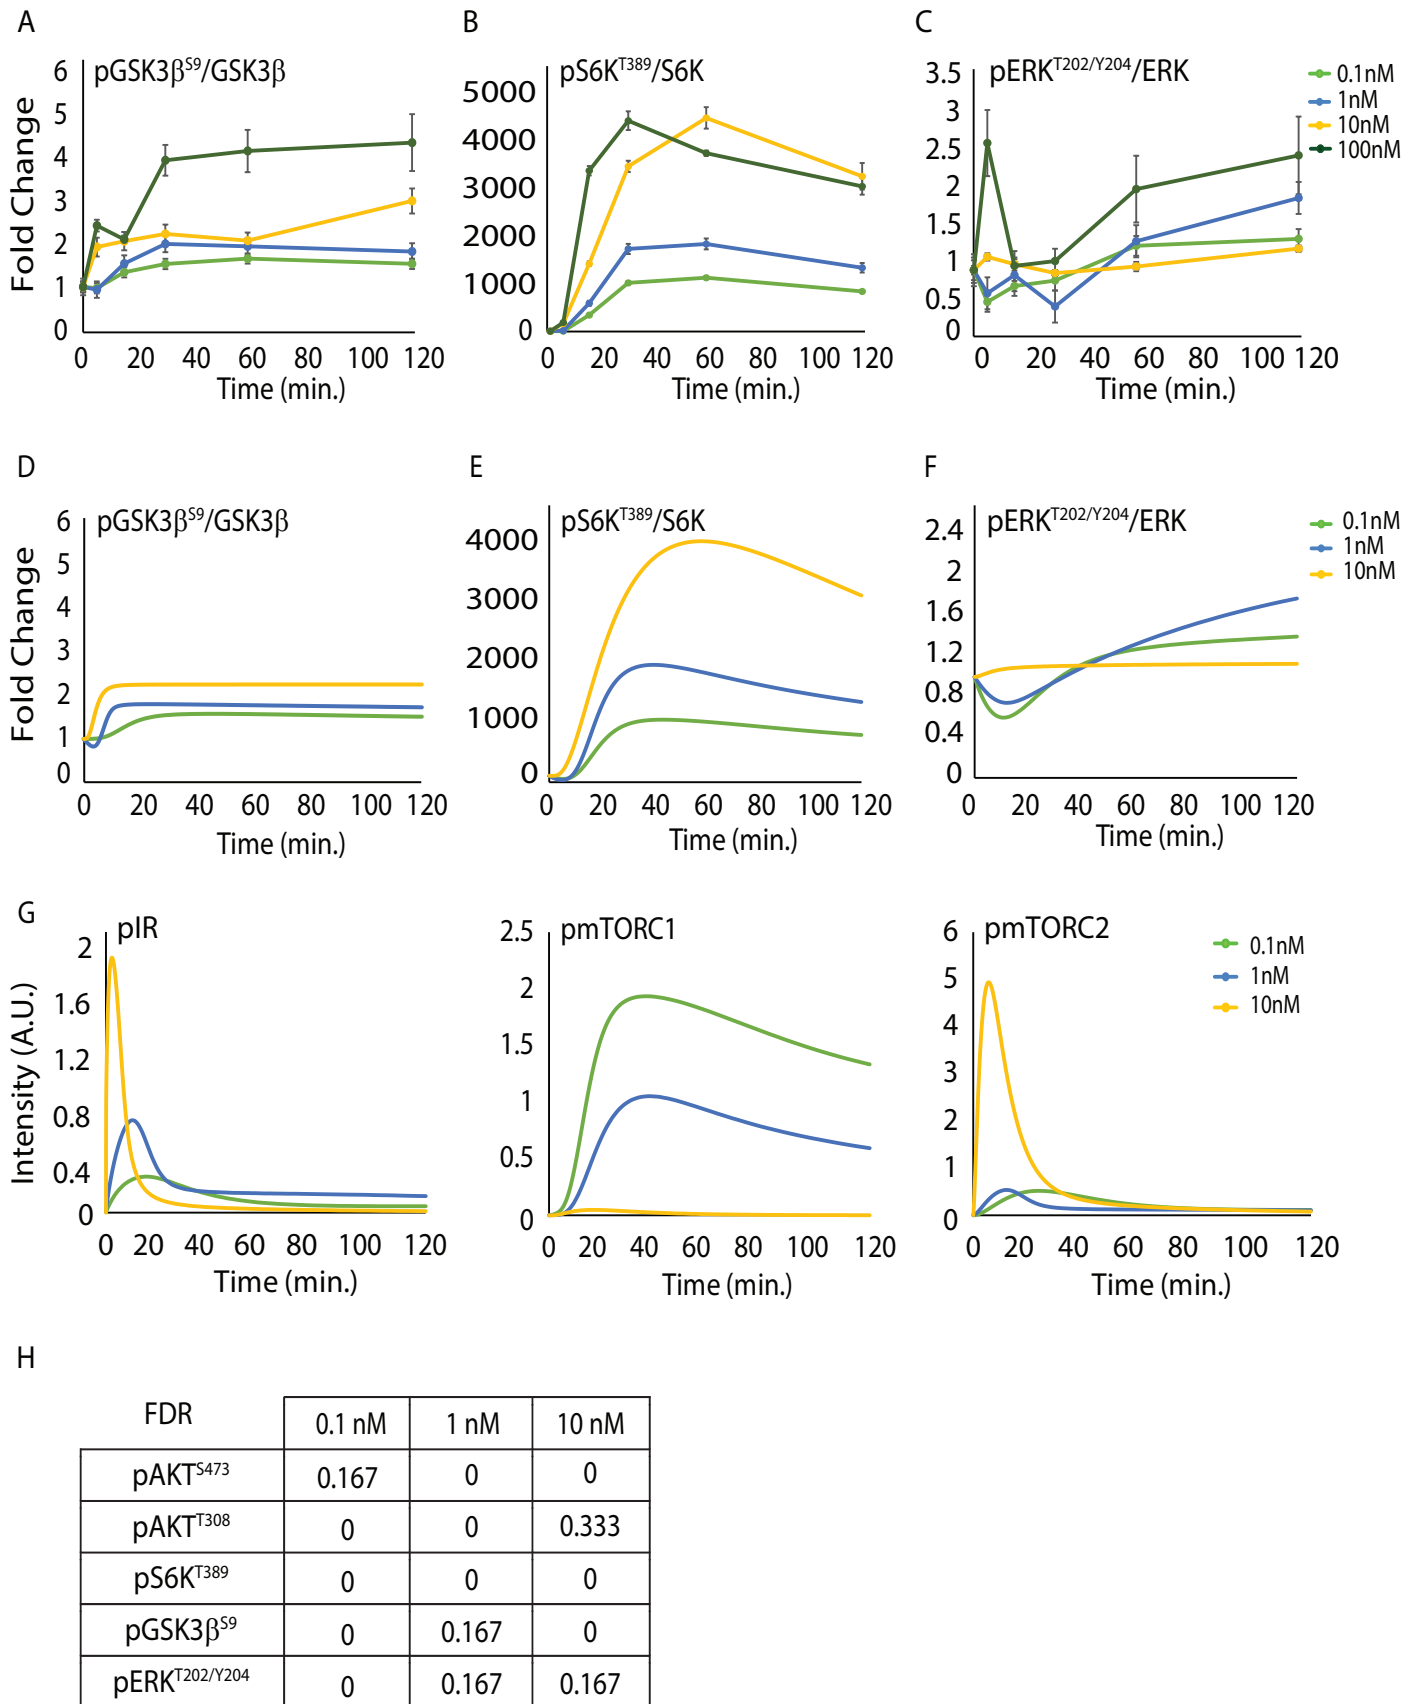

Figure 1 - figure supplement 3



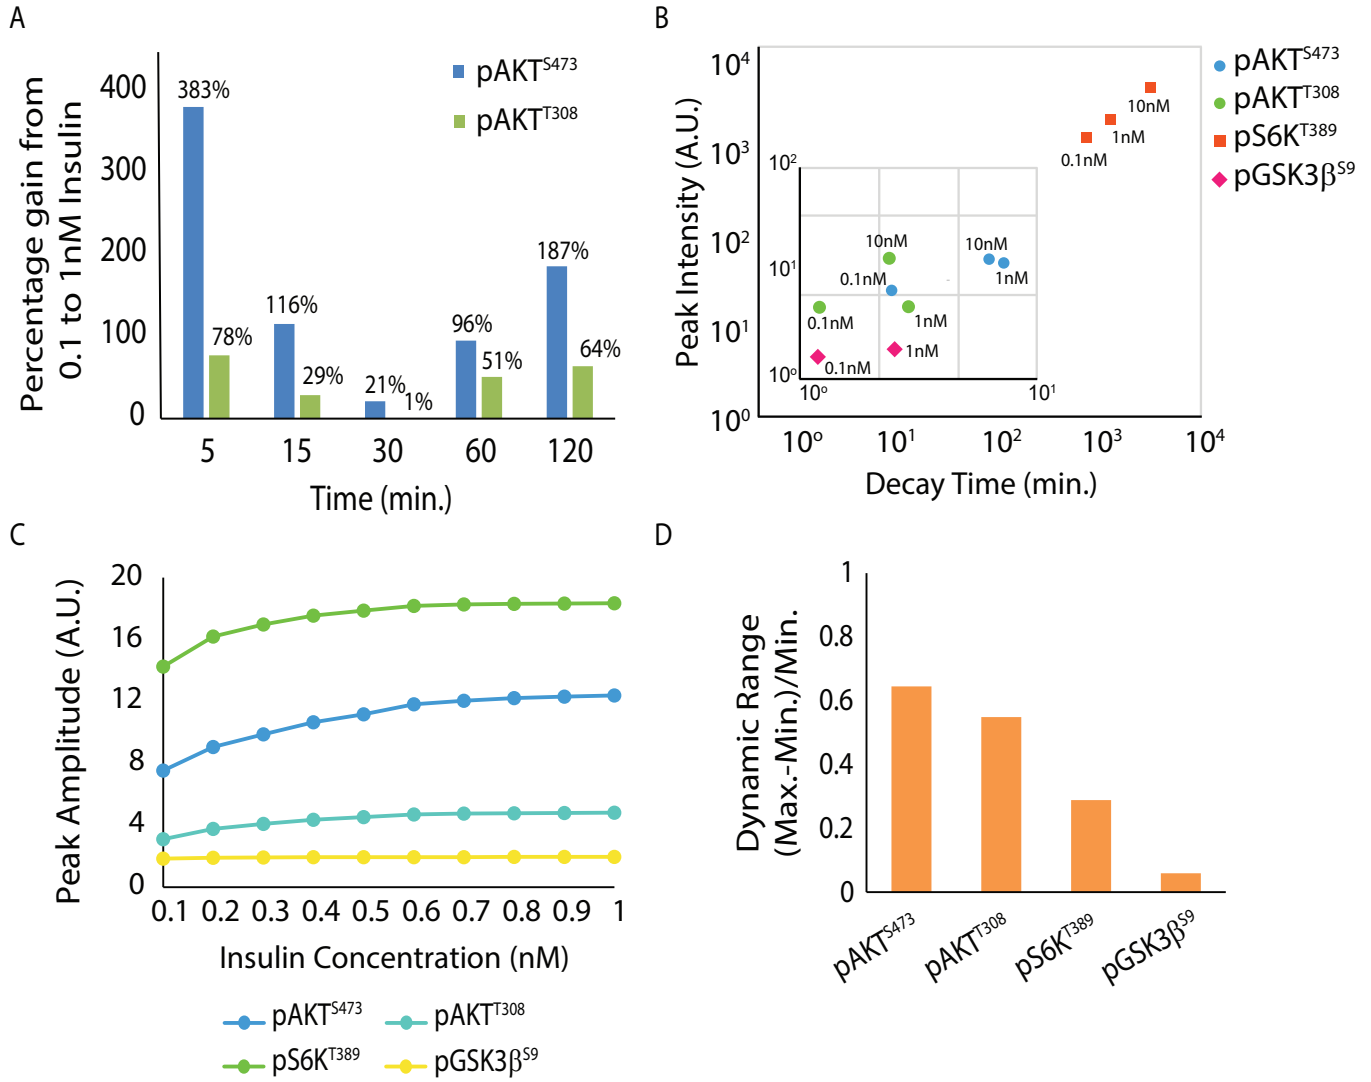

Figure 2

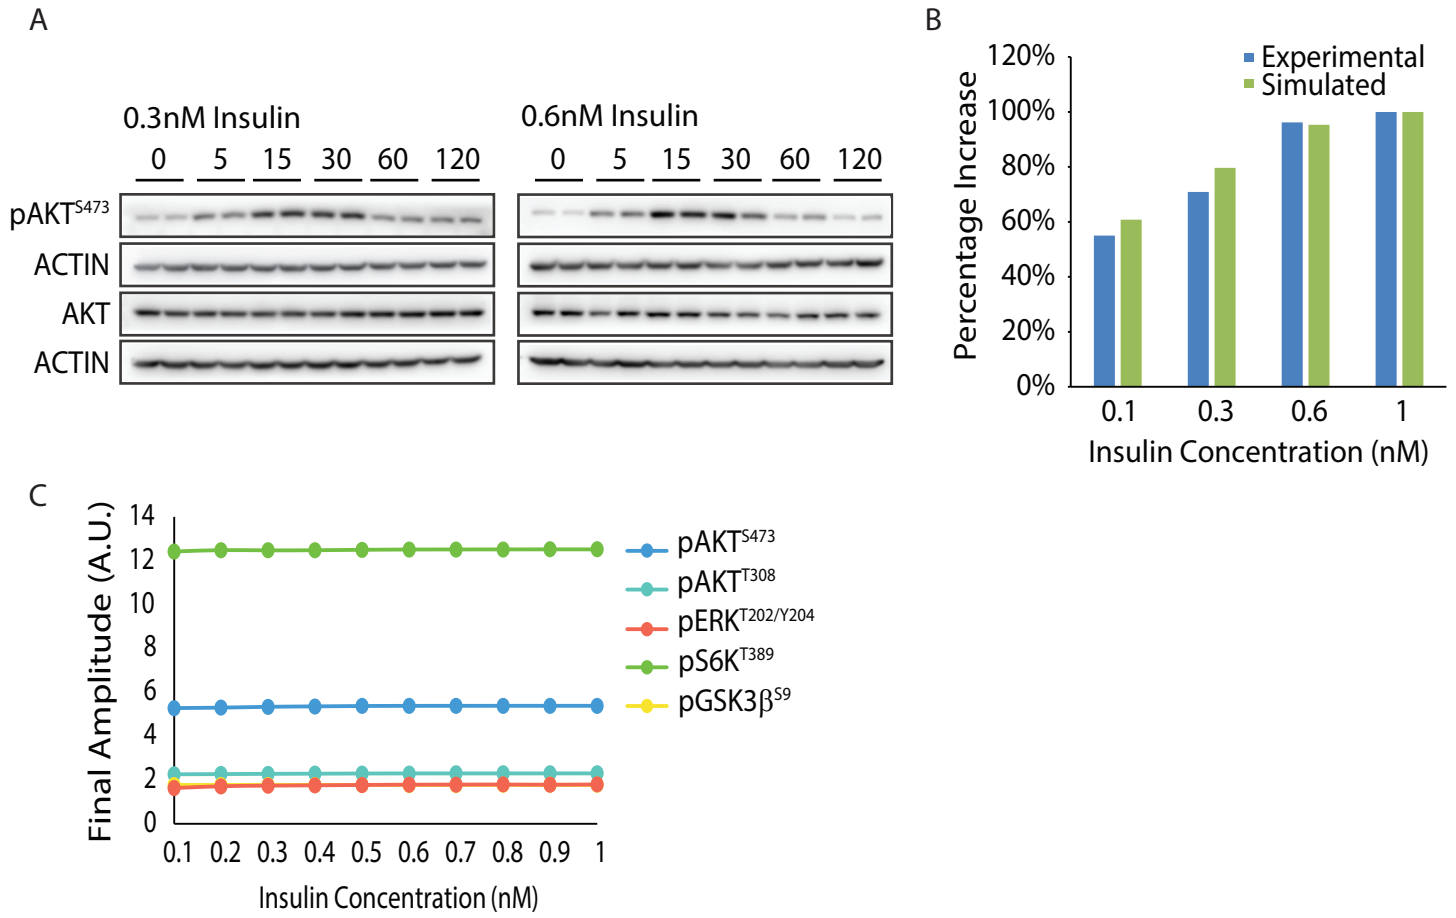

Figure 2 - figure supplement 1

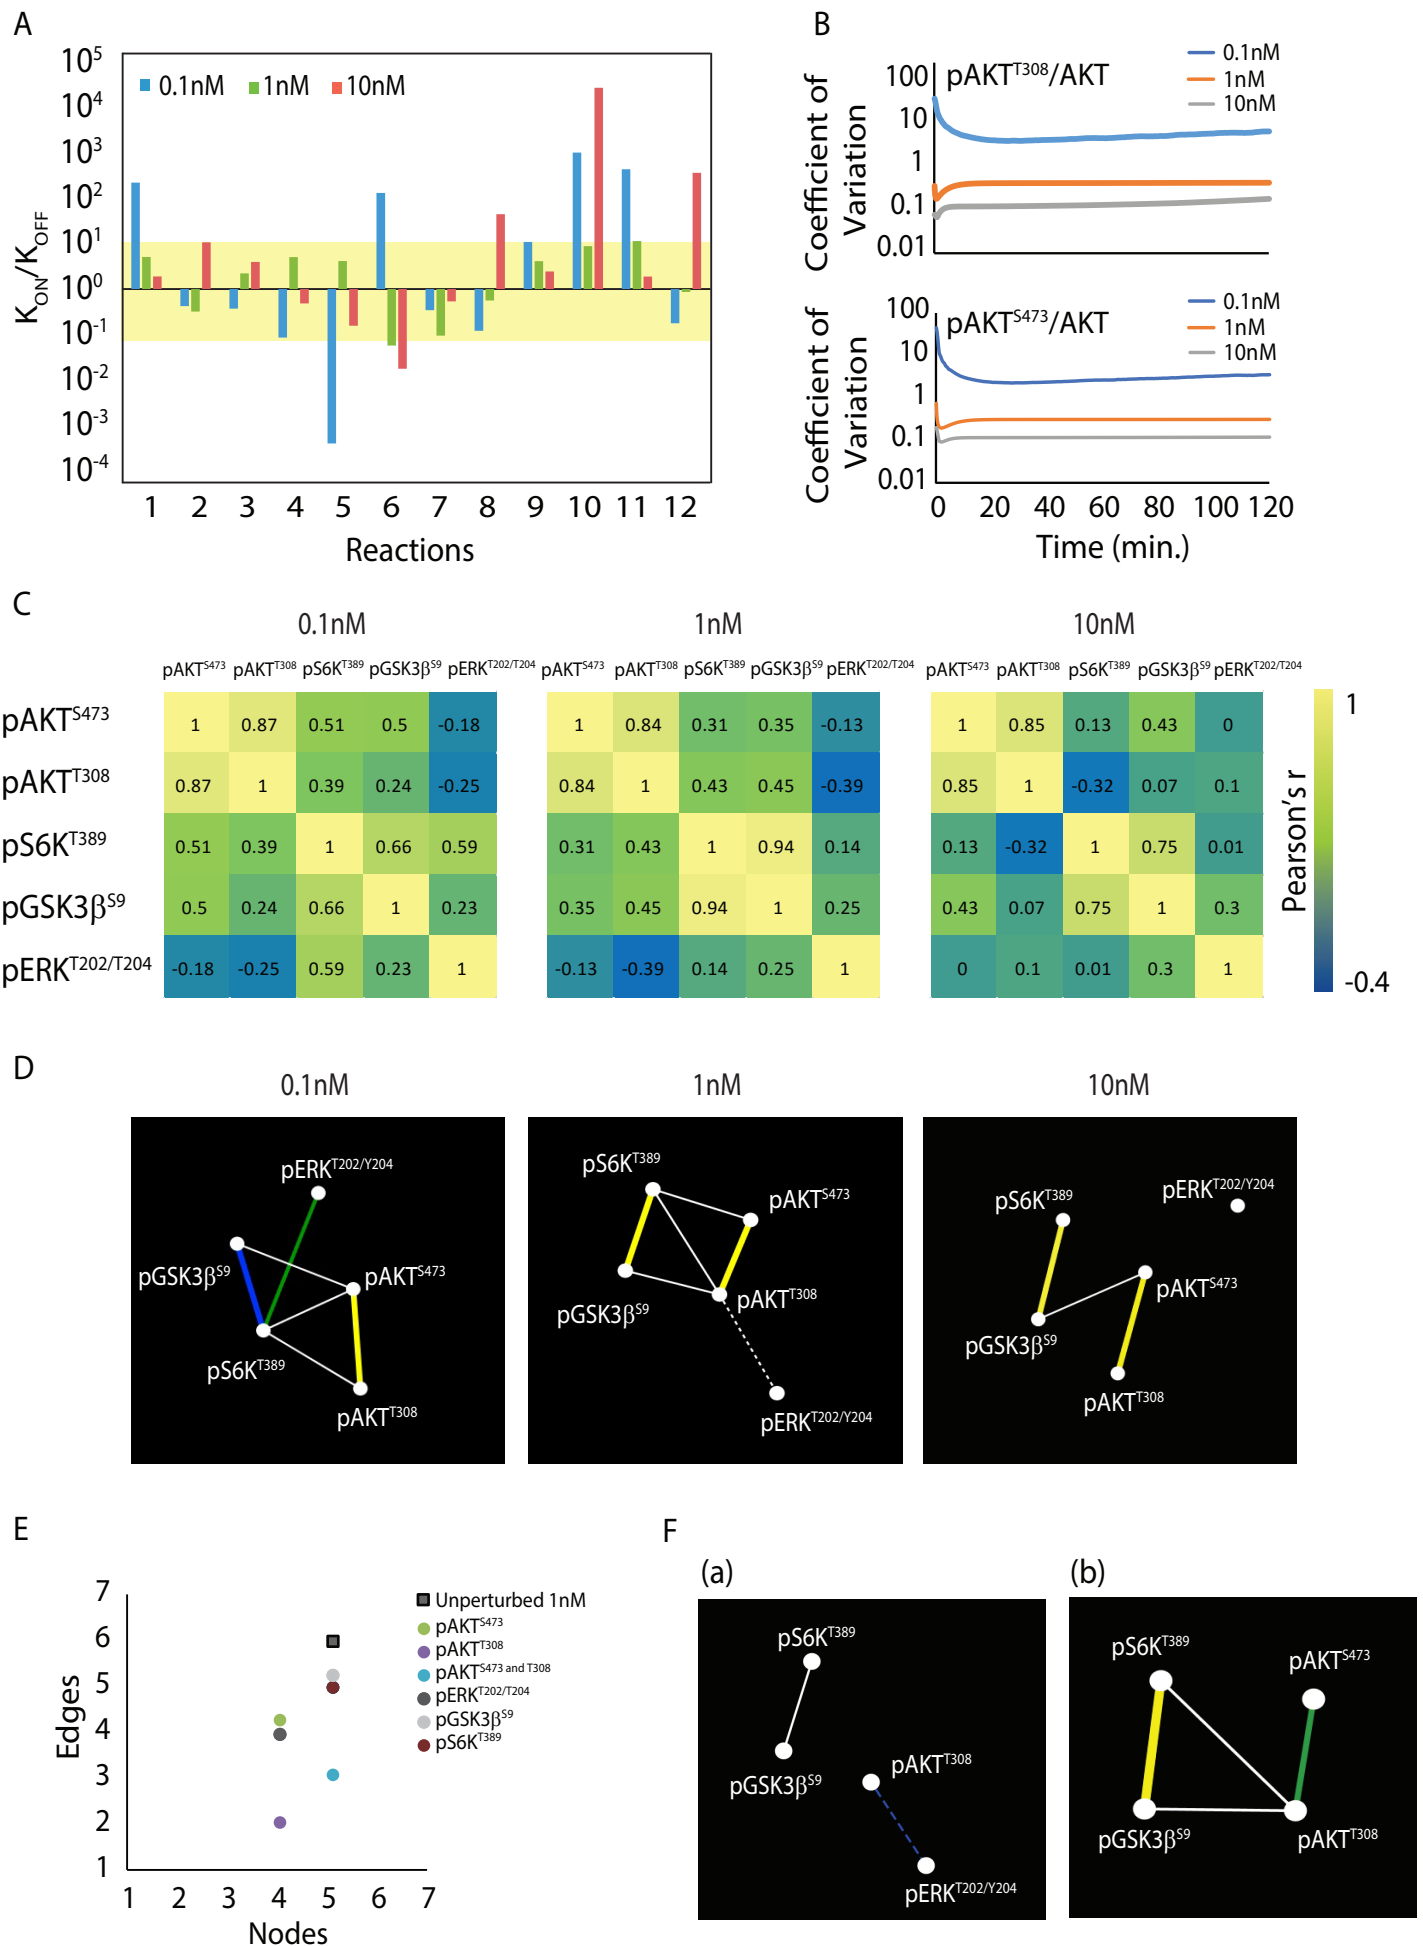

Figure 3

A

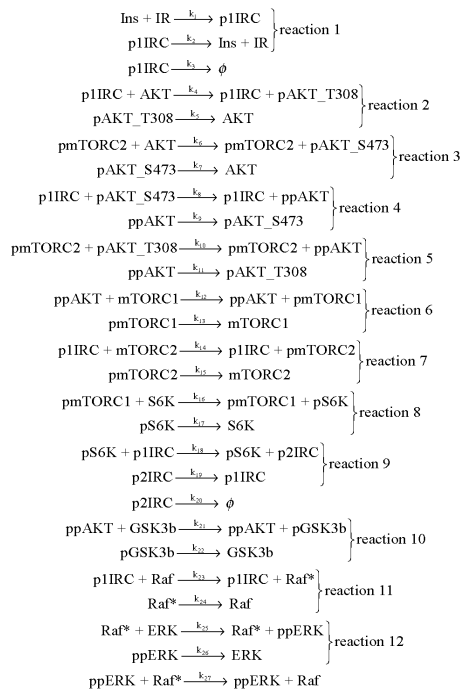

B

$$\begin{aligned}
 \frac{d[\text{IR}]}{dt} &= -[\text{IR}] \cdot [\text{Ins}] \cdot k_1 + [\text{p1IRC}] \cdot k_2 \\
 \frac{d[\text{p1IRC}]}{dt} &= [\text{IR}] \cdot [\text{Ins}] \cdot k_1 - [\text{p1IRC}] \cdot k_2 - [\text{p1IRC}] \cdot k_3 - [\text{pS6K}] \cdot [\text{p1IRC}] \cdot k_{18} \\
 &\quad + [\text{p2IRC}] \cdot k_{19} \\
 \frac{d[\text{pAKT\_T308}]}{dt} &= [\text{p1IRC}] \cdot ([\text{AKT}] - [\text{pAKT\_T308}] - [\text{pAKT\_S473}] - [\text{ppAKT}]) \cdot k_4 \\
 &\quad - [\text{pAKT\_T308}] \cdot k_5 - [\text{pmTORC2}] \cdot [\text{pAKT\_T308}] \cdot k_{10} + [\text{ppAKT}] \cdot k_{11} \\
 \frac{d[\text{pAKT\_S473}]}{dt} &= [\text{pmTORC2}] \cdot ([\text{AKT}] - [\text{pAKT\_T308}] - [\text{pAKT\_S473}] - [\text{ppAKT}]) \cdot k_6 \\
 &\quad - [\text{pAKT\_S473}] \cdot k_7 - [\text{p1IRC}] \cdot [\text{pAKT\_S473}] \cdot k_8 + [\text{ppAKT}] \cdot k_9 \\
 \frac{d[\text{ppAKT}]}{dt} &= [\text{p1IRC}] \cdot [\text{pAKT\_S473}] \cdot k_8 - [\text{ppAKT}] \cdot k_9 \\
 &\quad + [\text{pmTORC2}] \cdot [\text{pAKT\_T308}] \cdot k_{10} - [\text{ppAKT}] \cdot k_{11} \\
 \frac{d[\text{pmTORC1}]}{dt} &= [\text{ppAKT}] \cdot ([\text{mTORC1}] - [\text{pmTORC1}]) \cdot k_{12} - [\text{pmTORC1}] \cdot k_{13} \\
 \frac{d[\text{pmTORC2}]}{dt} &= [\text{p1IRC}] \cdot ([\text{mTORC2}] - [\text{pmTORC2}]) \cdot k_{14} - [\text{pmTORC2}] \cdot k_{15} \\
 \frac{d[\text{pS6K}]}{dt} &= [\text{pmTORC1}] \cdot ([\text{S6K}] - [\text{pS6K}]) \cdot k_{16} - [\text{pS6K}] \cdot k_{17} \\
 \frac{d[\text{p2IRC}]}{dt} &= [\text{pS6K}] \cdot [\text{p1IRC}] \cdot k_{18} - [\text{p2IRC}] \cdot k_{19} - [\text{p2IRC}] \cdot k_{20} \\
 \frac{d[\text{pGSK3b}]}{dt} &= [\text{ppAKT}] \cdot ([\text{GSK3b}] - [\text{pGSK3b}]) \cdot k_{21} - [\text{pGSK3b}] \cdot k_{22} \\
 \frac{d[\text{Raf}^*]}{dt} &= [\text{p1IRC}] \cdot ([\text{Raf}] - [\text{Raf}^*]) \cdot k_{23} - [\text{Raf}^*] \cdot k_{24} - [\text{ppERK}] \cdot [\text{Raf}^*] \cdot k_{27} \\
 \frac{d[\text{ppERK}]}{dt} &= [\text{Raf}^*] \cdot ([\text{ERK}] - [\text{ppERK}]) \cdot k_{25} - [\text{ppERK}] \cdot k_{26}
 \end{aligned}$$

C

| 0.1nM                |                           |             |           |         | 1nM                  |                           |             |           |         | 10nM                 |                           |             |           |         |
|----------------------|---------------------------|-------------|-----------|---------|----------------------|---------------------------|-------------|-----------|---------|----------------------|---------------------------|-------------|-----------|---------|
| Source               | Target                    | Interaction | Pearson r | p value | Source               | Target                    | Interaction | Pearson r | p value | Source               | Target                    | Interaction | Pearson r | p value |
| pAKT <sup>S473</sup> | pAKT <sup>T308</sup>      | pc          | 0.8732    | 0.0001  | pAKT <sup>S473</sup> | pAKT <sup>T308</sup>      | pc          | 0.8408    | 0.0001  | pAKT <sup>S473</sup> | pAKT <sup>T308</sup>      | pc          | 0.8451    | 0.0001  |
| pAKT <sup>S473</sup> | pS6K <sup>T389</sup>      | pc          | 0.5068    | 0.0115  | pAKT <sup>S473</sup> | pS6K <sup>T389</sup>      | pc          | 0.3085    | 0.1425  | pAKT <sup>S473</sup> | pS6K <sup>T389</sup>      | pc          | 0.1315    | 0.5403  |
| pAKT <sup>S473</sup> | pGSK3b <sup>S9</sup>      | pc          | 0.4997    | 0.0129  | pAKT <sup>S473</sup> | pGSK3b <sup>S9</sup>      | pc          | 0.3549    | 0.0888  | pAKT <sup>S473</sup> | pGSK3b <sup>S9</sup>      | pc          | 0.4332    | 0.0345  |
| pAKT <sup>S473</sup> | pERK <sup>T202/Y204</sup> | pc          | -0.1768   | 0.4086  | pAKT <sup>S473</sup> | pERK <sup>T202/Y204</sup> | pc          | -0.125    | 0.5607  | pAKT <sup>S473</sup> | pERK <sup>T202/Y204</sup> | pc          | 0.001001  | 0.9963  |
| pAKT <sup>T308</sup> | pS6K <sup>T389</sup>      | pc          | 0.3899    | 0.0596  | pAKT <sup>T308</sup> | pS6K <sup>T389</sup>      | pc          | 0.4316    | 0.0352  | pAKT <sup>T308</sup> | pS6K <sup>T389</sup>      | pc          | -0.3187   | 0.1291  |
| pAKT <sup>T308</sup> | pGSK3b <sup>S9</sup>      | pc          | 0.2441    | 0.2503  | pAKT <sup>T308</sup> | pGSK3b <sup>S9</sup>      | pc          | 0.4546    | 0.0256  | pAKT <sup>T308</sup> | pGSK3b <sup>S9</sup>      | pc          | 0.0665    | 0.7575  |
| pAKT <sup>T308</sup> | pERK <sup>T202/Y204</sup> | pc          | -0.2486   | 0.2415  | pAKT <sup>T308</sup> | pERK <sup>T202/Y204</sup> | pc          | -0.3916   | 0.0584  | pAKT <sup>T308</sup> | pERK <sup>T202/Y204</sup> | pc          | 0.1014    | 0.6375  |
| pS6K <sup>T389</sup> | pGSK3b <sup>S9</sup>      | pc          | 0.6607    | 0.0004  | pS6K <sup>T389</sup> | pGSK3b <sup>S9</sup>      | pc          | 0.9363    | 0.0001  | pS6K <sup>T389</sup> | pGSK3b <sup>S9</sup>      | pc          | 0.747     | <0.0001 |
| pS6K <sup>T389</sup> | pERK <sup>T202/Y204</sup> | pc          | 0.588     | 0.0025  | pS6K <sup>T389</sup> | pERK <sup>T202/Y204</sup> | pc          | 0.1423    | 0.5072  | pS6K <sup>T389</sup> | pERK <sup>T202/Y204</sup> | pc          | 0.0102    | 0.9623  |
| pGSK3b <sup>S9</sup> | pERK <sup>T202/Y204</sup> | pc          | 0.2302    | 0.2791  | pGSK3b <sup>S9</sup> | pERK <sup>T202/Y204</sup> | pc          | 0.2495    | 0.2397  | pGSK3b <sup>S9</sup> | pERK <sup>T202/Y204</sup> | pc          | 0.3045    | 0.148   |

Figure 3 - figure supplement 1



A

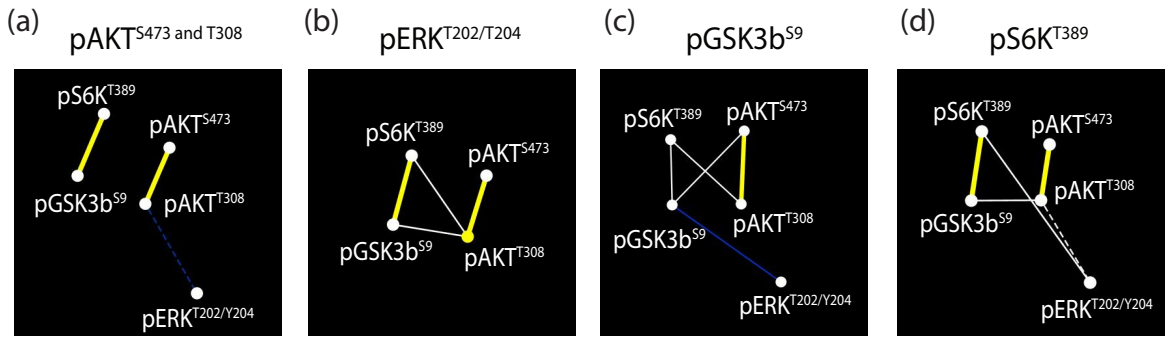

B

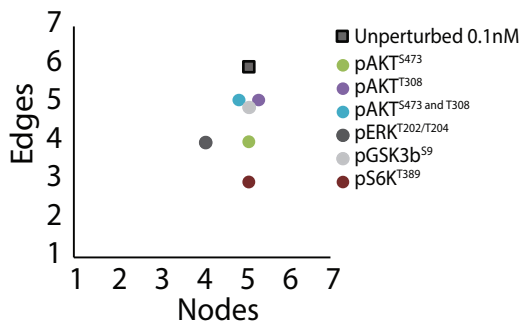

C

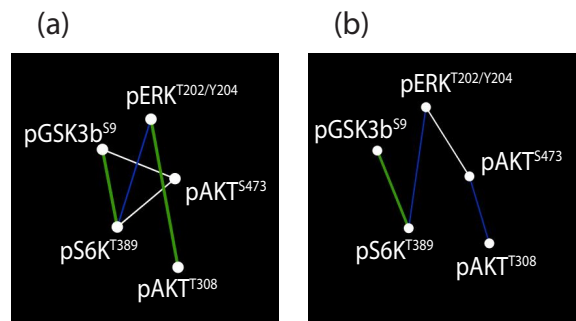

D

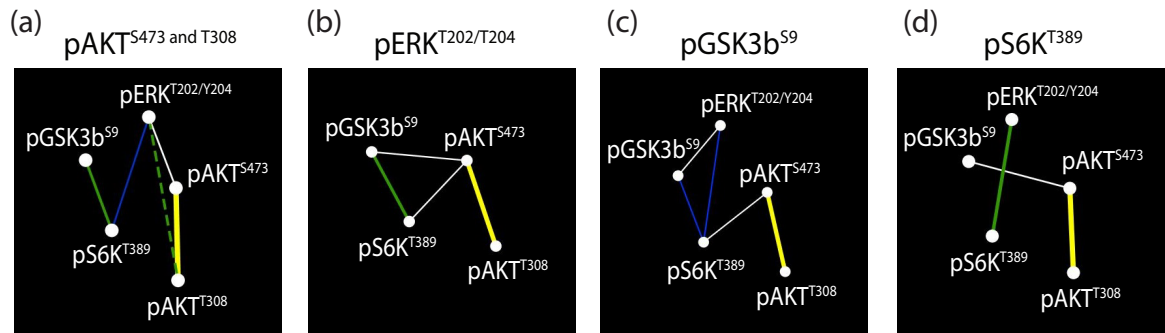

Figure 3 - figure supplement 3

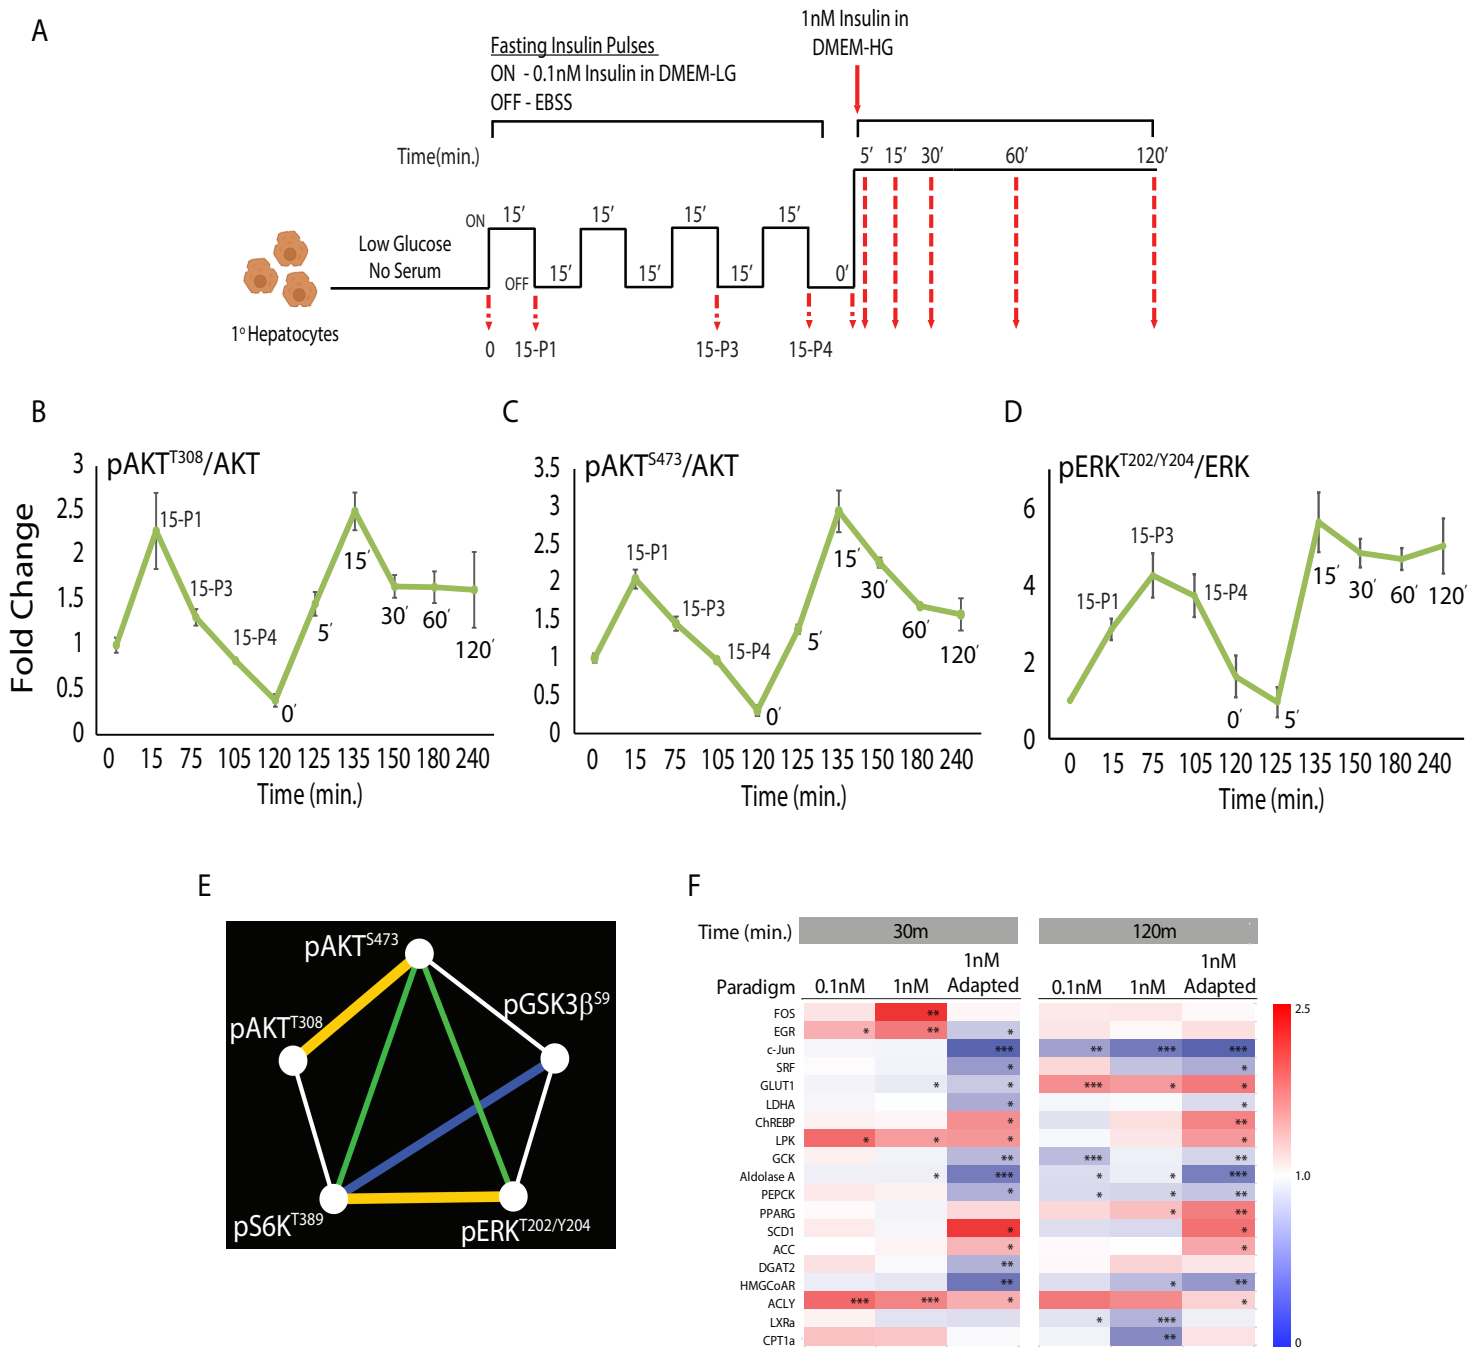

Figure 4

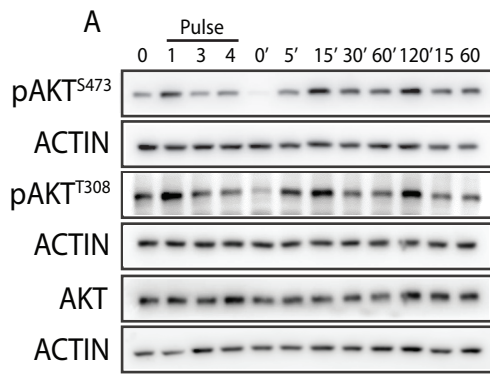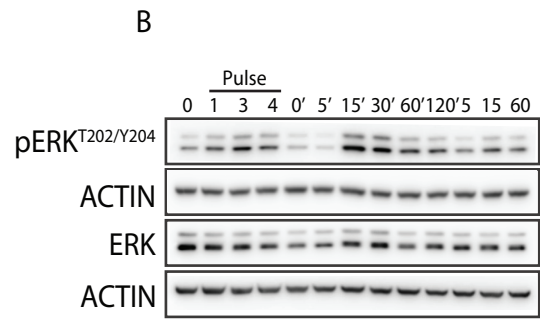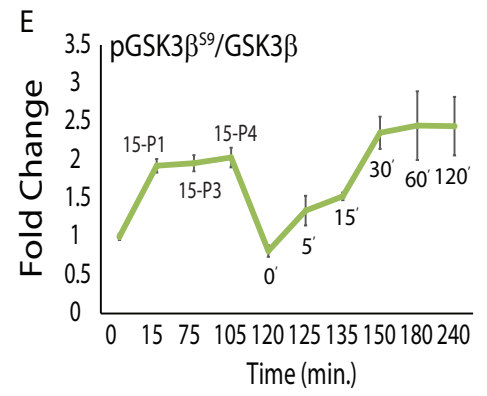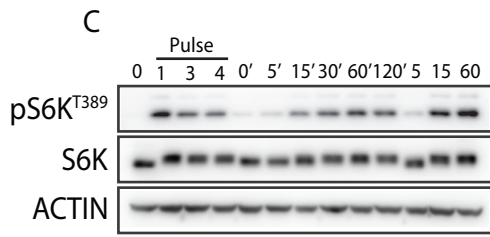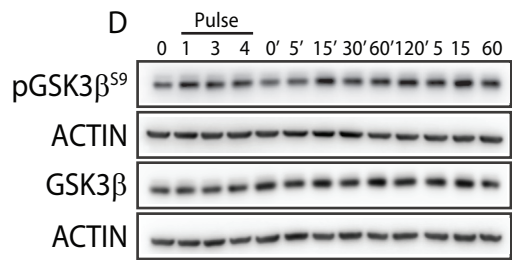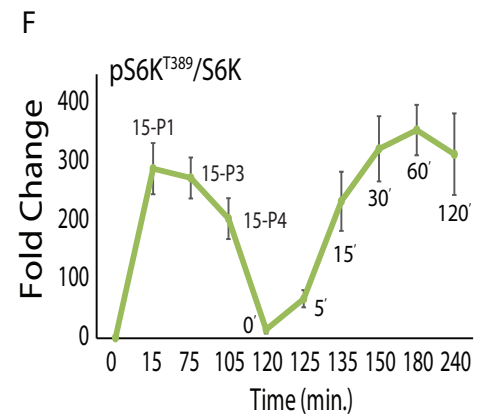

**G**

| Source               | Target                    | Interaction | Pearson r | p value |
|----------------------|---------------------------|-------------|-----------|---------|
| pAKT <sup>S473</sup> | pAKT <sup>T308</sup>      | pc          | 0.8762    | 0.0001  |
| pAKT <sup>S473</sup> | pS6K <sup>T389</sup>      | pc          | 0.6081    | 0.0074  |
| pAKT <sup>S473</sup> | pGSK3b <sup>S9</sup>      | pc          | 0.4746    | 0.0466  |
| pAKT <sup>S473</sup> | pERK <sup>T202/Y204</sup> | pc          | 0.6549    | 0.0032  |
| pAKT <sup>T308</sup> | pS6K <sup>T389</sup>      | pc          | 0.5071    | 0.0317  |
| pAKT <sup>T308</sup> | pGSK3b <sup>S9</sup>      | pc          | 0.419     | 0.0835  |
| pAKT <sup>T308</sup> | pERK <sup>T202/Y204</sup> | pc          | 0.4368    | 0.1908  |
| pS6K <sup>T389</sup> | pGSK3b <sup>S9</sup>      | pc          | 0.7692    | 0.0002  |
| pS6K <sup>T389</sup> | pERK <sup>T202/Y204</sup> | pc          | 0.8068    | 0.0001  |
| pGSK3b <sup>S9</sup> | pERK <sup>T202/Y204</sup> | pc          | 0.4866    | 0.0406  |

Figure 4 - figure supplement 1



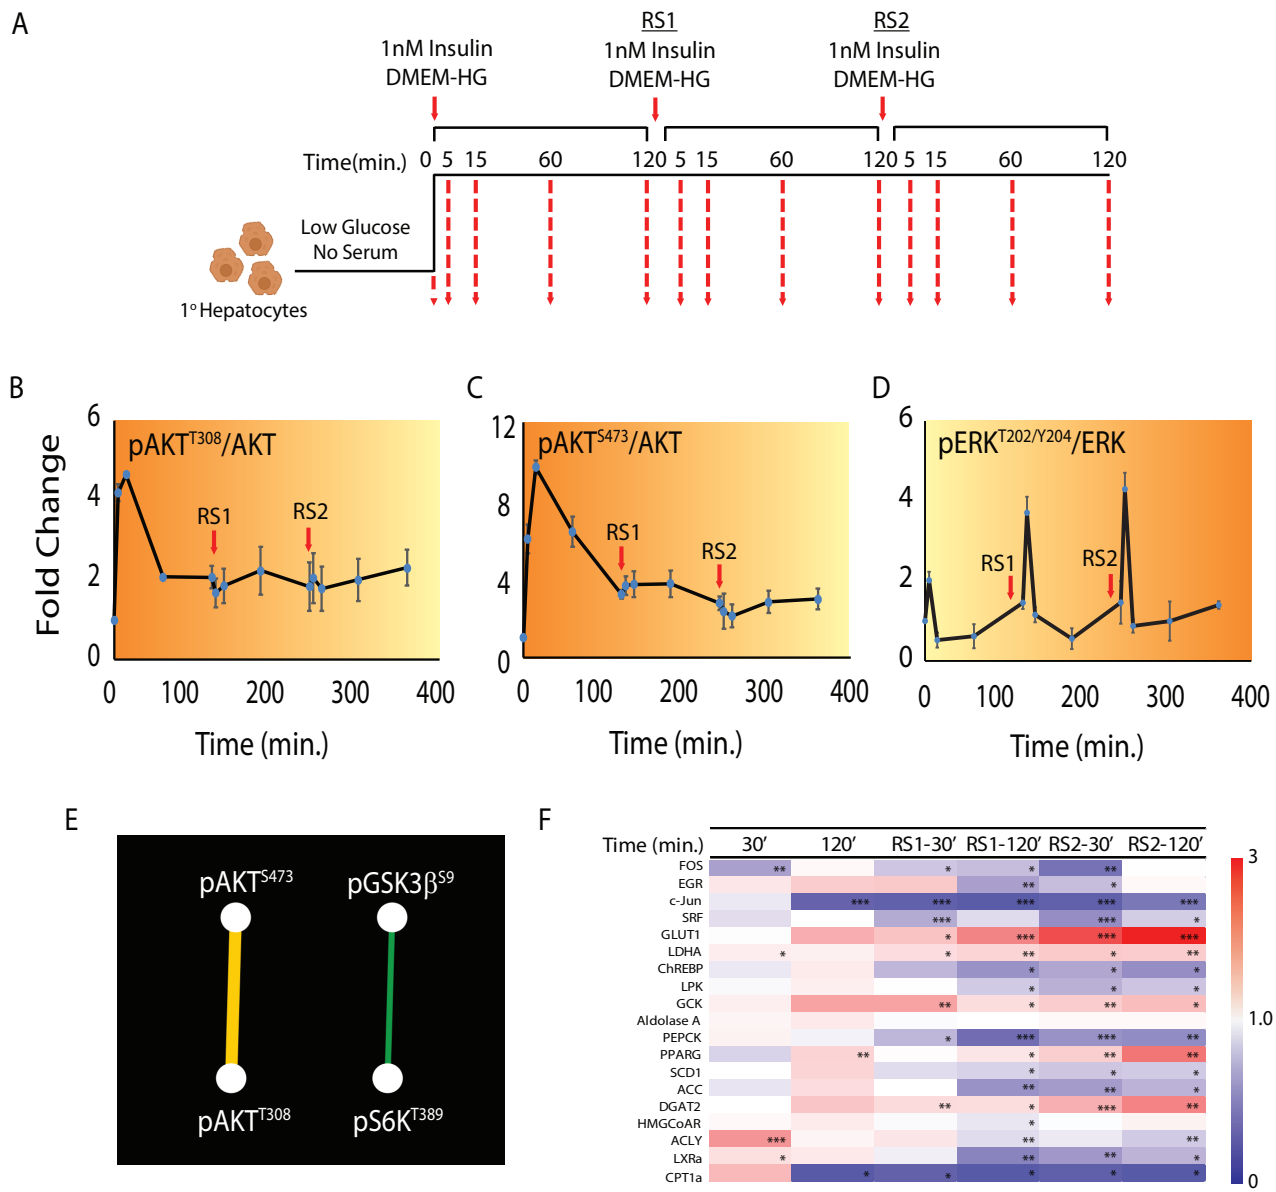

Figure 5

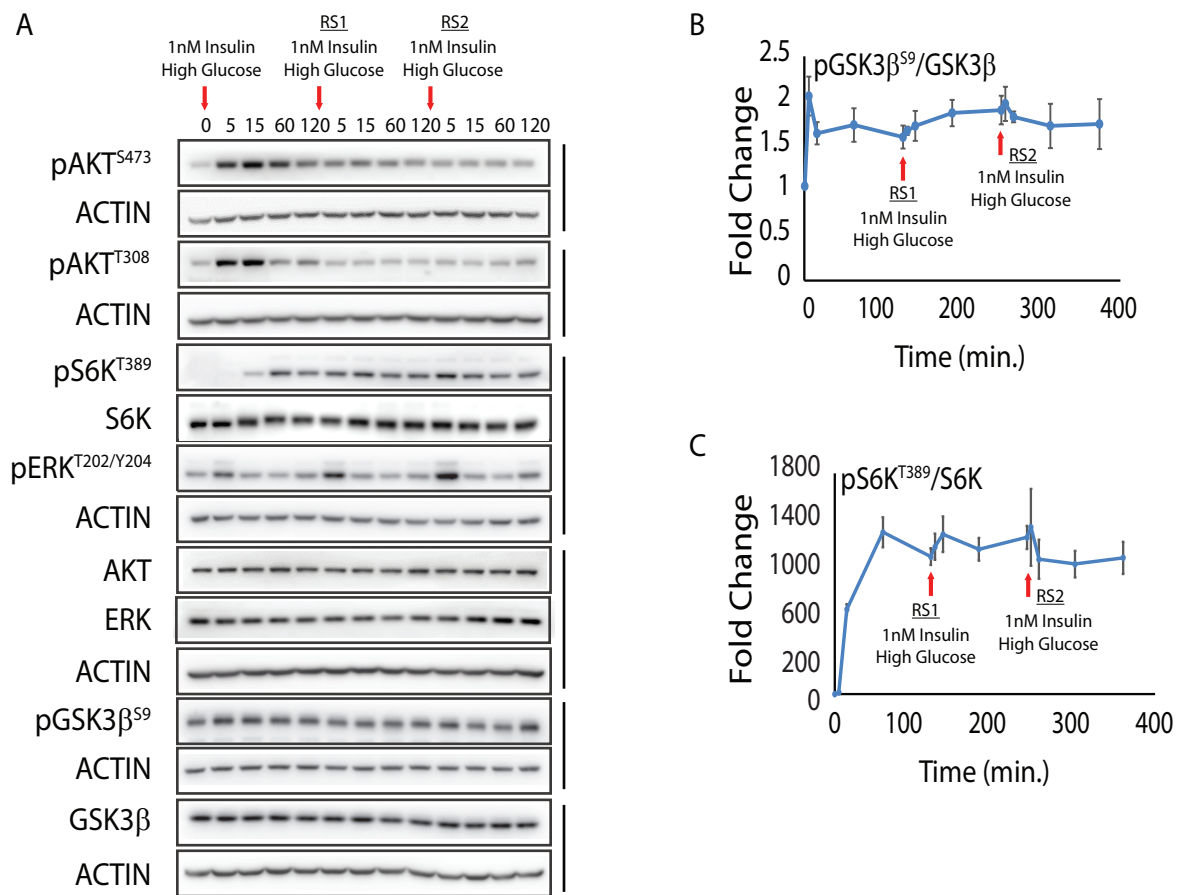

**C**

| Source               | Target                    | Interaction | Pearson r | p value |
|----------------------|---------------------------|-------------|-----------|---------|
| pAKT <sup>S473</sup> | pAKT <sup>T308</sup>      | pc          | 0.7641    | 0.0001  |
| pAKT <sup>S473</sup> | pS6K <sup>T389</sup>      | pc          | -0.05917  | 0.72    |
| pAKT <sup>S473</sup> | pGSK3b <sup>S9</sup>      | pc          | 0.1098    | 0.5059  |
| pAKT <sup>S473</sup> | pERK <sup>T202/Y204</sup> | pc          | -0.2116   | 0.1959  |
| pAKT <sup>T308</sup> | pS6K <sup>T389</sup>      | pc          | -0.246    | 0.1312  |
| pAKT <sup>T308</sup> | pGSK3b <sup>S9</sup>      | pc          | 0.03422   | 0.8361  |
| pAKT <sup>T308</sup> | pERK <sup>T202/Y204</sup> | pc          | -0.1189   | 0.471   |
| pS6K <sup>T389</sup> | pGSK3b <sup>S9</sup>      | pc          | 0.3354    | 0.0369  |
| pS6K <sup>T389</sup> | pERK <sup>T202/Y204</sup> | pc          | 0.157     | 0.3399  |
| pGSK3b <sup>S9</sup> | pERK <sup>T202/Y204</sup> | pc          | 0.2648    | 0.1033  |

Figure 5 - figure supplement 1
